# Supplementary material
Source: PubMed Central journal article supplement (PMC7198049)
Supplement: NIHMS1582434-supplement-SI.pdf [file NIHMS1582434-supplement-SI.pdf]

## **Extensive Test and Evaluation of CHARMM36IDPSFF Force Field for Intrinsically Disordered Protein and Folded Protein**

Hao Liu<sup>1</sup>, Dong Song<sup>1</sup>, Yangpeng Zhang<sup>1</sup>, Sheng Yang<sup>1</sup>, Ray Luo<sup>2,\*</sup>, and Hai-Feng Chen<sup>1,3,\*</sup>

<sup>1</sup>State Key Laboratory of Microbial Metabolism, Department of Bioinformatics and Biostatistics, SJTU-Yale Joint Center for Biostatistics, National Experimental Teaching Center for Life Sciences and Biotechnology, School of Life Sciences and Biotechnology, Shanghai Jiao Tong University, 800 Dongchuan Road, Shanghai, 200240, China

<sup>2</sup>Departments of Molecular Biology and Biochemistry, Chemical Engineering and Materials Science, Biomedical Engineering, University of California, Irvine, California 92697-3900, USA

<sup>3</sup>Shanghai Center for Bioinformation Technology, 1278 Keyuan Road, Shanghai, 200235, China

\*Corresponding authors

Email addresses: [haifengchen@sjtu.edu.cn](mailto:haifengchen@sjtu.edu.cn); [rlo@uci.edu](mailto:rlo@uci.edu);

Tel: 86-21-34204348

Fax: 86-21-34204348

The authors declare that there is no conflict of interest.

Table S1. Karplus equations used to calculate the scalar couplings.

| Scalar couplings             | Karplus equations                                                                                                 |
|------------------------------|-------------------------------------------------------------------------------------------------------------------|
| ${}^3J_{\text{HNH}\alpha}^1$ | ${}_3J_i = 8.40\cos^2(\varphi_i - 60^\circ) - 1.36\cos(\varphi_i - 60^\circ) + 0.33$                              |
| ${}^3J_{\text{HNC}\beta}^1$  | ${}_3J_i = 3.71\cos^2(\varphi_i + 60^\circ) - 0.59\cos(\varphi_i + 60^\circ) + 0.08$                              |
| ${}^3J_{\text{HNC}}^1$       | ${}_3J_i = 4.36\cos^2(\varphi_i + 180^\circ) - 1.08\cos(\varphi_i + 180^\circ) + 0.01$                            |
| ${}^3J_{\text{HaC}}^2$       | ${}_3J_i = 3.72\cos^2(\varphi_i + 120^\circ) - 2.18\cos(\varphi_i + 120^\circ) + 1.28$                            |
| ${}^3J_{\text{HNC}\alpha}^3$ | $J_i$ $= -0.23\cos(\varphi_i) - 0.20\cos(\psi_{i-1}) + 0.07\sin(\varphi_i) + 0.08\sin$                            |
| ${}^3J_{\text{CC}}^4$        | ${}_3J_i = 1.78\cos^2(\varphi_i) - 0.95\cos(\varphi_i) + 0.46$                                                    |
| ${}^2J_{\text{NC}\alpha}^5$  | ${}_2J_i = -0.66\cos^2(\psi_{i-1}) + 1.52\cos(\psi_{i-1}) + 7.85$                                                 |
| ${}^1J_{\text{NC}\alpha}^6$  | ${}_1J_i = 1.70\cos^2(\psi_i) - 0.98\cos(\psi_i) + 9.51$                                                          |
| ${}^1J_{\text{HaC}\alpha}^7$ | ${}_1J_i = 1.4\sin(\psi_i + 138^\circ) - 4.1\cos(2(\psi_i + 138^\circ)) + 1.7\cos(2(\varphi_i + 30^\circ)) + R_a$ |

<sup>a</sup>.  $R$  is a residue-specific value.

$R = 143.9$  for ALA,  $142.8$  for ARG,  $144.5$  for ASN,  $144.4$  for ASP,  
 $143.5$  for CYS,  $142.9$  for GLN,  $142.8$  for GLU,  $143.9$  for HIS,  
 $141.7$  for ILE,  $142.5$  for LEU,  $142.8$  for LYS,  $142.8$  for MET,  
 $144.0$  for PHE,  $150.1$  for PRO,  $143.5$  for SER,  $142.4$  for THR,  
 $144.1$  for TRP,  $144.1$  for TYR,  $141.7$  for VAL.

Table S2. RMS errors between the simulation and experimental chemical shifts for all tested peptides and proteins. All the units are in ppm.

| System                  | Force field & water model | C $\alpha$ | C $\beta$ | C    | N    | H $\alpha$ | HN   |
|-------------------------|---------------------------|------------|-----------|------|------|------------|------|
| ALA <sub>5</sub>        | C36IDPSFF                 | 0.16       | 0.20      | 0.34 | 0.63 | 0.02       | 0.33 |
| ALA <sub>7</sub>        | C36IDPSFF                 | 0.09       | 0.20      | 0.30 | 0.63 | 0.02       | 0.28 |
| A $\beta$ 40 (PDB)      | C36IDPSFF                 | 0.39       | 0.40      |      | 1.96 | 0.12       | 0.31 |
|                         | C36IDPSFF/disp-water      | 0.38       | 0.33      |      | 1.43 | 0.10       | 0.31 |
| A $\beta$ 40 (Extended) | C36IDPSFF                 | 0.37       | 0.38      |      | 1.67 | 0.12       | 0.27 |
| A $\beta$ 42            | C36IDPSFF                 | 0.44       | 0.48      |      | 1.76 | 0.21       | 0.22 |
| ACTR                    | C36IDPSFF                 | 0.69       | 0.33      | 0.57 | 1.38 |            | 0.17 |
|                         | C36IDPSFF/disp-water      | 0.52       | 0.26      | 0.55 | 1.11 |            | 0.15 |
| drkN SH3                | C36IDPSFF                 | 0.52       | 0.46      | 0.95 | 1.27 |            | 0.19 |
|                         | C36IDPSFF/disp-water      | 0.72       | 0.44      | 1.11 | 1.07 |            | 0.22 |
| hIAPP                   | C36IDPSFF                 | 0.71       | 0.49      |      | 1.95 | 0.12       | 0.28 |
| Histatin-5              | C36IDPSFF                 |            |           |      |      | 0.06       | 0.26 |
| Trp-cage                | C36IDPSFF                 |            |           |      |      | 0.31       | 0.36 |
| BPTI                    | C36IDPSFF                 | 0.77       | 1.58      | 0.66 | 1.57 | 0.18       | 0.33 |
| GB3                     | C36IDPSFF                 | 1.18       | 0.75      | 0.66 | 1.65 | 0.18       | 0.29 |
| HEWL                    | C36IDPSFF                 | 0.75       | 1.66      | 1.13 | 1.48 |            |      |
| 2JPU                    | C36IDPSFF                 | 1.04       | 0.62      | 0.66 | 1.34 | 0.13       | 0.33 |
| 2JQN                    | C36IDPSFF                 | 0.91       | 0.81      | 0.77 | 1.62 | 0.17       | 0.42 |
| 2KL6                    | C36IDPSFF                 | 1.06       | 1.42      | 1.01 | 3.54 | 0.31       | 0.59 |

Table S3. RMS errors between the experimental scalar couplings and simulate values of C36IDPSFF for the tested peptides and proteins. All the units are in Hz.

| Systems                 | Scalar Couplings                     | RMS error |                      |
|-------------------------|--------------------------------------|-----------|----------------------|
|                         |                                      | C36IDPSFF | C36IDPSFF/disp-water |
| ALA <sub>5</sub>        | $^3J_{\text{HNH}\alpha}$             | 0.08      |                      |
|                         | $^3J_{\text{HNC}\beta}$              | 0.17      |                      |
|                         | $^3J_{\text{H}\alpha\text{C}}$       | 0.04      |                      |
|                         | $^3J_{\text{HNC}}$                   | 0.06      |                      |
|                         | $^3J_{\text{HNC}\alpha}$             | 0.09      |                      |
|                         | $^2J_{\text{NC}\alpha}$              | 0.42      |                      |
|                         | $^1J_{\text{NC}\alpha}$              | 0.23      |                      |
| ALA <sub>7</sub>        | $^3J_{\text{HNH}\alpha}$             | 0.08      |                      |
|                         | $^3J_{\text{HNC}\beta}$              | 0.17      |                      |
|                         | $^3J_{\text{H}\alpha\text{C}}$       | 0.19      |                      |
|                         | $^3J_{\text{HNC}}$                   | 0.12      |                      |
|                         | $^3J_{\text{HNC}\alpha}$             | 0.09      |                      |
|                         | $^2J_{\text{NC}\alpha}$              | 0.32      |                      |
|                         | $^1J_{\text{NC}\alpha}$              | 0.26      |                      |
| A $\beta$ 40 (PDB)      | $^3J_{\text{HNH}\alpha}$             | 0.57      | 0.42                 |
|                         | $^3J_{\text{H}\alpha\text{C}}$       | 0.43      | 0.43                 |
|                         | $^3J_{\text{CC}}$                    | 0.18      | 0.17                 |
|                         | $^2J_{\text{NC}\alpha}$              | 0.74      | 0.50                 |
|                         | $^1J_{\text{NC}\alpha}$              | 0.37      | 0.37                 |
|                         | $^1J_{\text{H}\alpha\text{C}\alpha}$ | 1.47      | 1.37                 |
| A $\beta$ 40 (Extended) | $^3J_{\text{HNH}\alpha}$             | 0.56      |                      |
|                         | $^3J_{\text{H}\alpha\text{C}}$       | 0.33      |                      |
|                         | $^3J_{\text{CC}}$                    | 0.18      |                      |
|                         | $^2J_{\text{NC}\alpha}$              | 0.55      |                      |
|                         | $^1J_{\text{NC}\alpha}$              | 0.36      |                      |
|                         | $^1J_{\text{H}\alpha\text{C}\alpha}$ | 1.48      |                      |
| A $\beta$ 42            |                                      | 0.68      |                      |
| drkN SH3                |                                      | 1.22      |                      |
| Histatin-5              | $^3J_{\text{HNH}\alpha}$             | 0.84      |                      |
| BPTI                    |                                      | 0.94      |                      |
| GB3                     | $^3J_{\text{HNH}\alpha}$             | 1.10      |                      |
|                         | $^3J_{\text{HNC}\beta}$              | 0.47      |                      |
|                         | $^3J_{\text{HNC}}$                   | 0.59      |                      |

Table S4. Comparison of experimental data and  $C\alpha$  calculated chemical shifts in simulations of  $A\beta_{40}$  started from PDB structure and extended structure. Experimental data were taken from Ref<sup>8</sup>. Standard errors of the mean are provided using block analysis. All units are in ppm.

| Residues         | Initial Structure |                  |       | Residues | Initial Structure |                  |       |
|------------------|-------------------|------------------|-------|----------|-------------------|------------------|-------|
|                  | PDB               | Extended         | Exp.  |          | PDB               | Extended         | Exp.  |
| A2               | $-0.34 \pm 0.03$  | $-0.29 \pm 0.00$ | 0.31  | A21      | $-0.33 \pm 0.00$  | $-0.31 \pm 0.02$ | 0.01  |
| E3               | $0.70 \pm 0.01$   | $0.49 \pm 0.00$  | -0.21 | E22      | $0.30 \pm 0.00$   | $-0.02 \pm 0.03$ | -0.31 |
| F4               | $-0.17 \pm 0.01$  | $-0.09 \pm 0.02$ | -0.17 | D23      | $-0.37 \pm 0.02$  | $-0.29 \pm 0.02$ | -0.23 |
| R5               | $-0.55 \pm 0.01$  | $-0.43 \pm 0.01$ | -0.38 | V24      | $0.42 \pm 0.03$   | $0.46 \pm 0.02$  | 0.66  |
| H6               | $1.24 \pm 0.00$   | $0.97 \pm 0.00$  | 1.28  | G25      | $0.28 \pm 0.03$   | $0.40 \pm 0.04$  | 0.30  |
| D7               | $-0.01 \pm 0.01$  | $-0.10 \pm 0.01$ | -0.24 | S26      | $-0.21 \pm 0.05$  | $-0.14 \pm 0.02$ | 0.17  |
| S8               | $0.24 \pm 0.01$   | $0.14 \pm 0.01$  | 0.63  | N27      | $0.13 \pm 0.04$   | $0.08 \pm 0.00$  | 0.29  |
| G9               | $0.12 \pm 0.02$   | $0.11 \pm 0.01$  | 0.22  | K28      | $-0.25 \pm 0.01$  | $0.00 \pm 0.01$  | 0.37  |
| Y10              | $-0.07 \pm 0.05$  | $-0.43 \pm 0.03$ | 0.25  | G29      | $0.03 \pm 0.00$   | $0.03 \pm 0.02$  | -0.01 |
| E11              | $-0.11 \pm 0.03$  | $-0.42 \pm 0.00$ | -0.22 | A30      | $-0.34 \pm 0.01$  | $-0.26 \pm 0.00$ | 0.06  |
| V12              | $0.20 \pm 0.06$   | $-0.36 \pm 0.00$ | 0.60  | I31      | $-0.13 \pm 0.00$  | $-0.16 \pm 0.03$ | -0.09 |
| H13              | $1.12 \pm 0.03$   | $1.07 \pm 0.03$  | 0.79  | I32      | $0.71 \pm 0.02$   | $-0.02 \pm 0.01$ | -0.08 |
| H14              | $1.71 \pm 0.02$   | $1.01 \pm 0.04$  | 1.03  | G33      | $0.33 \pm 0.01$   | $0.04 \pm 0.01$  | -0.01 |
| Q15              | $0.04 \pm 0.01$   | $-0.55 \pm 0.02$ | 0.50  | L34      | $-0.23 \pm 0.01$  | $-0.03 \pm 0.04$ | 0.07  |
| K16              | $0.31 \pm 0.03$   | $-0.14 \pm 0.02$ | 0.15  | M35      | $-0.25 \pm 0.00$  | $-0.28 \pm 0.03$ | 0.14  |
| L17              | $0.11 \pm 0.02$   | $-0.34 \pm 0.02$ | -0.06 | V36      | $-0.27 \pm 0.05$  | $-0.09 \pm 0.02$ | 0.31  |
| V18              | $-0.27 \pm 0.05$  | $-0.23 \pm 0.13$ | -0.33 | G37      | $0.33 \pm 0.02$   | $0.25 \pm 0.01$  | 0.06  |
| F19              | $-0.10 \pm 0.01$  | $-0.29 \pm 0.03$ | -0.39 | G38      | $0.13 \pm 0.01$   | $0.09 \pm 0.02$  | -0.10 |
| F20              | $-0.56 \pm 0.01$  | $-0.51 \pm 0.00$ | -0.47 | V39      | $-0.37 \pm 0.02$  | $-0.15 \pm 0.03$ | 0.12  |
| <b>RMS error</b> | <b>0.39</b>       | <b>0.37</b>      |       |          |                   |                  |       |

Table S5. Comparison of experimental data and calculated  $^3J_{\text{HNH}\alpha}$  scalar couplings in simulations of A $\beta$ 40 started from PDB structure and extended structure. Experimental data were taken from Ref<sup>9</sup>. Standard errors of the mean are provided using block analysis. All units are in Hz.

| Residues         | Initial Structure |             | Exp. | Residues | Initial Structure |             | Exp. |
|------------------|-------------------|-------------|------|----------|-------------------|-------------|------|
|                  | PDB               | Extended    |      |          | PDB               | Extended    |      |
| A2               | 5.94 ± 0.14       | 6.04 ± 0.07 | -    | A21      | 6.29 ± 0.05       | 6.05 ± 0.09 | 5.60 |
| E3               | 6.80 ± 0.02       | 7.01 ± 0.09 | 6.30 | E22      | 7.00 ± 0.14       | 6.59 ± 0.16 | 5.95 |
| F4               | 6.88 ± 0.09       | 7.18 ± 0.11 | 7.02 | D23      | 7.30 ± 0.11       | 7.21 ± 0.09 | 6.64 |
| R5               | 6.74 ± 0.17       | 7.24 ± 0.10 | 7.25 | V24      | 6.41 ± 0.25       | 6.59 ± 0.11 | 6.82 |
| H6               | 6.03 ± 0.18       | 6.95 ± 0.11 | -    | G25      | 5.92 ± 0.16       | 5.90 ± 0.11 | 5.96 |
| D7               | 7.06 ± 0.12       | 7.25 ± 0.12 | 6.86 | S26      | 6.72 ± 0.14       | 7.03 ± 0.15 | 6.51 |
| S8               | 6.52 ± 0.19       | 6.76 ± 0.10 | 5.86 | N27      | 7.26 ± 0.18       | 7.38 ± 0.11 | 7.32 |
| G9               | 5.81 ± 0.14       | 5.69 ± 0.09 | 6.35 | K28      | 7.63 ± 0.09       | 7.17 ± 0.08 | 6.46 |
| Y10              | 6.99 ± 0.05       | 7.19 ± 0.15 | 6.38 | G29      | 6.25 ± 0.18       | 5.80 ± 0.16 | 6.03 |
| E11              | 7.25 ± 0.13       | 7.29 ± 0.08 | 6.29 | A30      | 5.66 ± 0.19       | 5.88 ± 0.14 | 5.49 |
| V12              | 7.07 ± 0.17       | 8.04 ± 0.13 | 6.78 | I31      | 7.34 ± 0.11       | 7.60 ± 0.11 | 7.65 |
| H13              | 6.71 ± 0.23       | 7.18 ± 0.15 | 7.25 | I32      | 6.13 ± 0.07       | 7.79 ± 0.09 | 7.45 |
| H14              | 6.99 ± 0.12       | 7.16 ± 0.13 | -    | G33      | 5.35 ± 0.13       | 5.66 ± 0.17 | 5.96 |
| Q15              | 6.95 ± 0.10       | 7.55 ± 0.09 | 6.26 | L34      | 7.25 ± 0.16       | 7.19 ± 0.18 | 6.72 |
| K16              | 6.77 ± 0.11       | 7.34 ± 0.18 | 6.22 | M35      | 7.28 ± 0.08       | 7.17 ± 0.17 | 7.25 |
| L17              | 7.51 ± 0.23       | 7.22 ± 0.10 | 6.69 | V36      | 7.18 ± 0.15       | 7.15 ± 0.09 | 7.49 |
| V18              | 7.85 ± 0.15       | 8.04 ± 0.15 | 8.30 | G37      | 5.86 ± 0.09       | 6.10 ± 0.09 | 5.98 |
| F19              | 8.05 ± 0.13       | 7.86 ± 0.09 | 7.70 | G38      | 5.88 ± 0.04       | 6.00 ± 0.08 | 5.99 |
| F20              | 7.65 ± 0.16       | 7.86 ± 0.10 | 7.74 | V39      | 7.55 ± 0.11       | 7.86 ± 0.09 | 7.94 |
| <b>RMS error</b> | <b>0.57</b>       | <b>0.56</b> |      |          |                   |             |      |

Table S6. Difference between experimental data and simulated observables from C36IDPSFF in this study and a99SB-disp in previous work. The differences of chemical shifts and J-couplings were estimated by RMS errors, and the differences of RDCs were estimated by Q factors. The differences of  $R_g$  were estimated by  $R_{g_{Penalty}}$  same with previous work. The  ${}^3J_{\text{HNH}\alpha}$  couplings were compared and referred to  ${}^3J$  here.

| Protein<br>s | Force Field &<br>water model | Differences between Exp. and Sim. |           |       |       |            |       |                   |      |       |
|--------------|------------------------------|-----------------------------------|-----------|-------|-------|------------|-------|-------------------|------|-------|
|              |                              | Ca                                | C $\beta$ | C     | N     | H $\alpha$ | HN    | ${}^3J$           | RDCs | $R_g$ |
| AB40         | a99SB-disp                   | 0.47                              | 0.40      |       | 1.54  | 0.09       | 0.29  | 0.64              | 0.50 | 0.05  |
|              | C36IDPSFF                    | 0.42                              | 0.76      |       | 1.31  | 0.14       | 0.24  | 0.57              | 0.77 | 0.07  |
| ACTR         | a99SB-disp                   | 0.46                              | 0.30      | 0.42  | 0.87  |            | 0.18  |                   | 0.81 | 0.11  |
|              | C36IDPSFF                    | 0.69                              | 0.57      | 0.60  | 1.22  |            | 0.17  |                   | 0.93 | 0.44  |
| drkN<br>SH3  | a99SB-disp                   | 0.50                              | 0.50      | 0.65  |       | 0.10       | 0.23  | 0.70              | 0.91 | 0.08  |
|              | C36IDPSFF                    | 0.54                              | 0.66      | 0.62  |       | 0.14       | 0.22  | 1.22              | 0.70 | 0.13  |
| 2JPU         | a99SB-disp                   | 1.205                             | 0.814     | 0.951 | 1.976 | 0.179      | 0.376 |                   |      |       |
|              | C36IDPSFF                    | 1.39                              | 0.91      | 1.05  | 2.32  | 0.43       | 0.25  |                   |      |       |
| 2JQN         | a99SB-disp                   | 1.458                             | 1.418     | 1.333 | 2.924 | 0.315      | 0.572 |                   |      |       |
|              | C36IDPSFF                    | 1.33                              | 1.27      | 1.29  | 2.66  | 0.29       | 0.51  |                   |      |       |
| 2KL6         | a99SB-disp                   | 1.033                             | 1.145     | 0.998 | 3.028 | 0.275      | 0.561 |                   |      |       |
|              | C36IDPSFF                    | 1.10                              | 1.44      | 0.93  | 2.08  | 0.38       | 0.30  |                   |      |       |
| BPTI         | a99SB-disp                   |                                   |           |       |       |            |       | 1.22              |      |       |
|              | C36IDPSFF                    |                                   |           |       |       |            |       | 0.94              |      |       |
| GB3          | a99SB-disp                   |                                   |           |       |       |            |       | 1.13 <sup>a</sup> |      |       |
|              | C36IDPSFF                    |                                   |           |       |       |            |       | 0.77 <sup>a</sup> |      |       |

<sup>a</sup>. The  ${}^3J_{\text{HNH}\alpha}$ ,  ${}^3J_{\text{HNC}\beta}$ , and  ${}^3J_{\text{HNC}}$  of GB3 are all considered as  ${}^3J$  here.

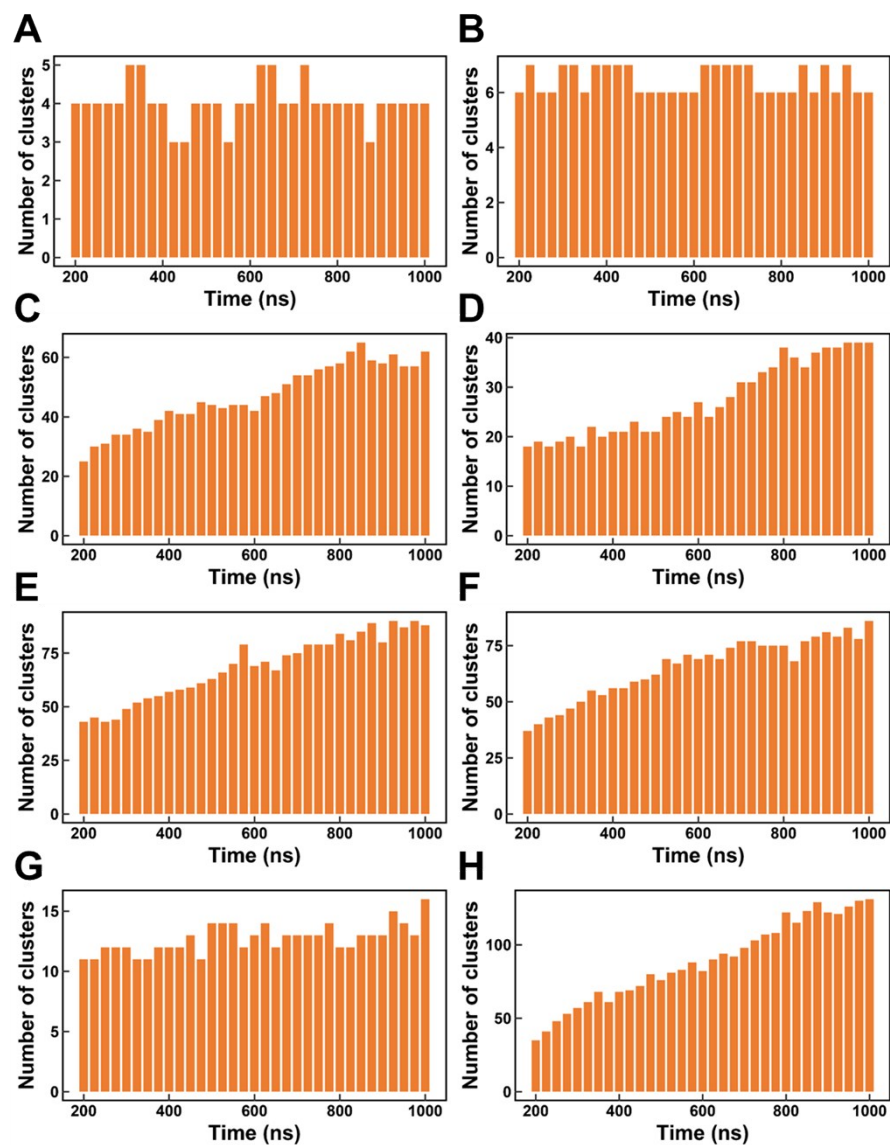

Fig. S1. Time-dependent number of conformation clusters for disordered peptides and proteins. (a) ALA<sub>5</sub>. (b) ALA<sub>7</sub>. (c) A $\beta$ 40. (d) A $\beta$ 42. (e) ACTR. (f) drkN SH3 (g) hIAPP. (h) Histatin-5.



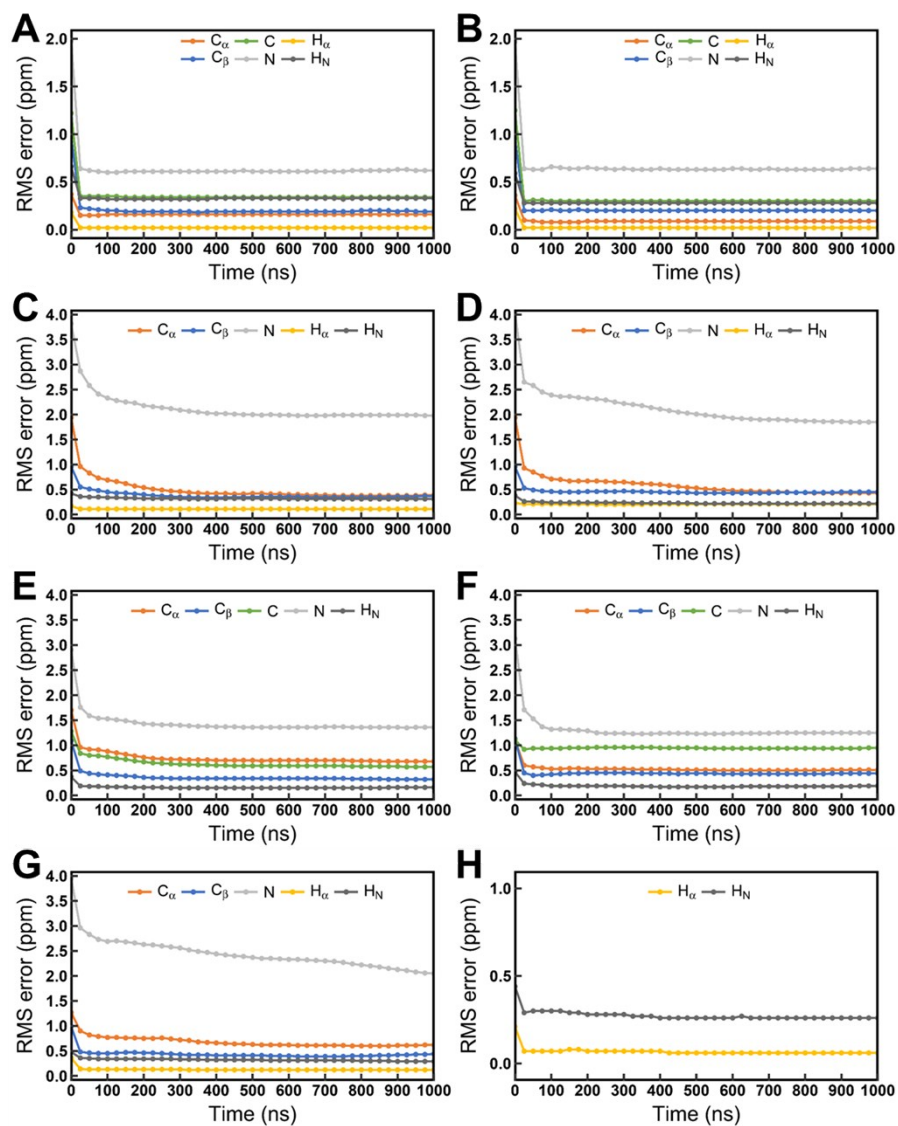

Fig. S2. Time-dependent RMS errors between experimental data and cumulative-averaged simulated chemical shifts for disordered peptides and proteins. (a) ALA5. (b) ALA7. (c) A $\beta$ 40. (d) A $\beta$ 42. (e) ACTR. (f) drkN SH3 (g) hIAPP. (h) Histatin-5.

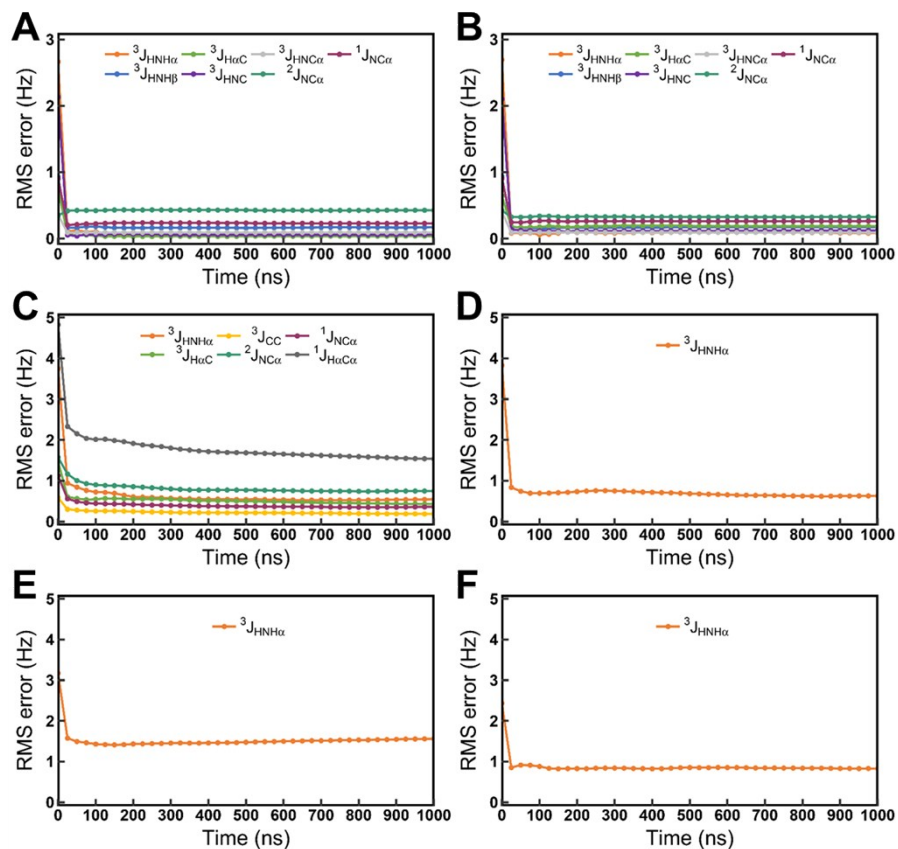

Fig. S3. Time-dependent RMS errors between experimental data and cumulative-averaged simulated scalar couplings for disordered peptides and proteins. (a) ALA5. (b) ALA7. (c) A $\beta$ 40. (d) A $\beta$ 42. (e) drkN SH3. (f) Histatin-5.

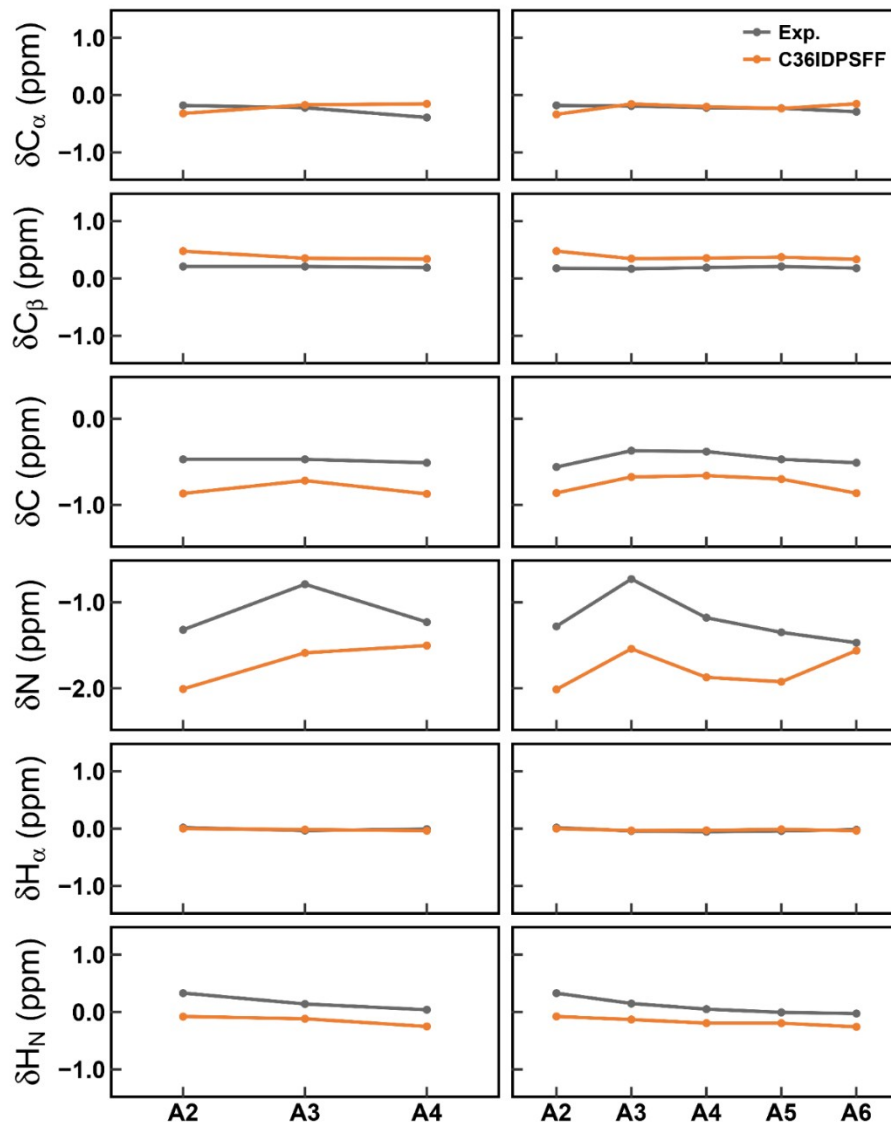

Fig. S4. Comparison of Simulated and experimental chemical shifts of  $C_{\alpha}$ ,  $C_{\beta}$ , C, N,  $H_{\alpha}$ , and HN atoms for ALA<sub>5</sub> and ALA<sub>7</sub>. The left panel stands for ALA<sub>5</sub> and the right panel stands for ALA<sub>7</sub>. Experimental values were taken from Ref<sup>10</sup>.

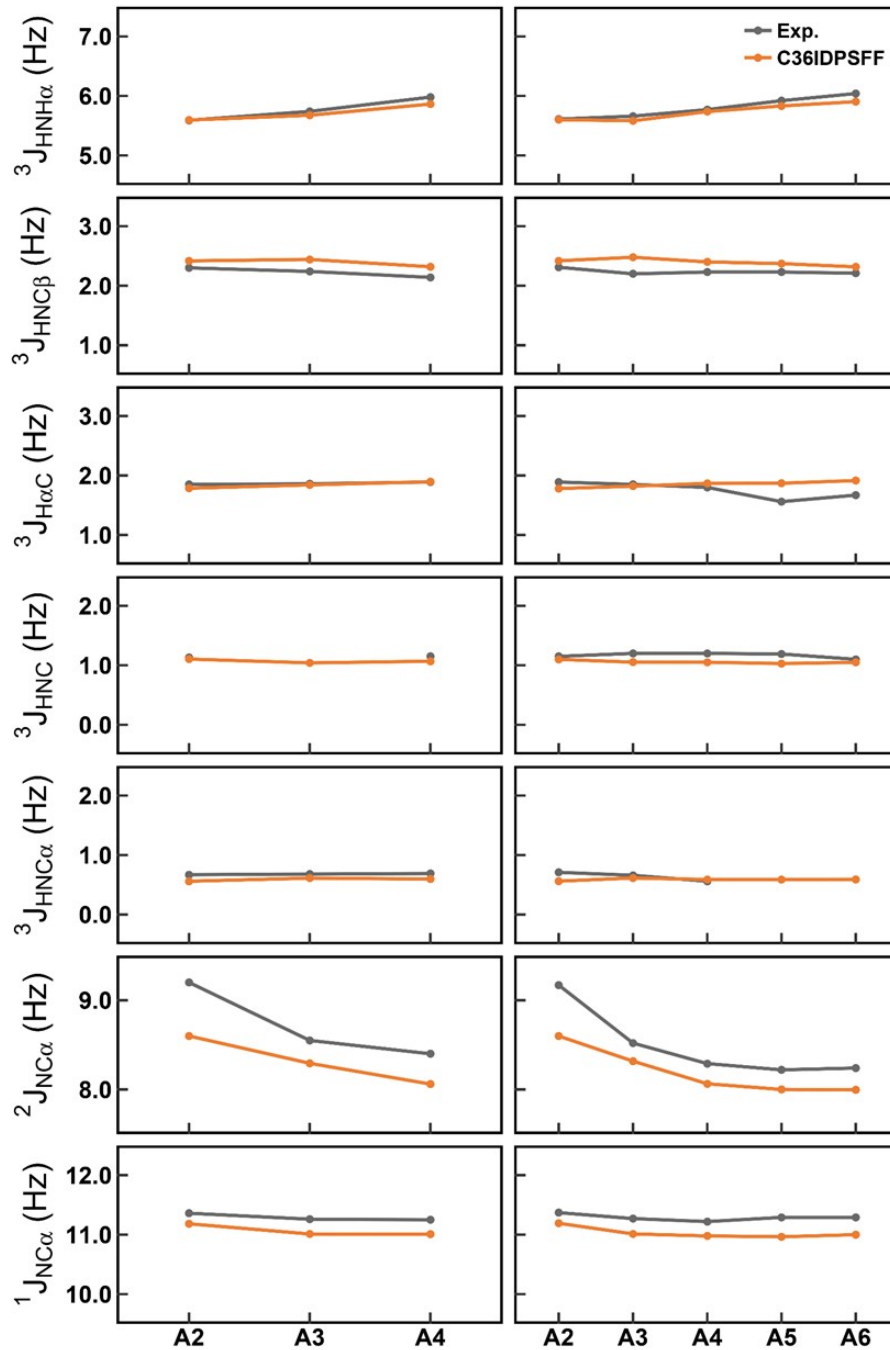

Fig. S5. Comparison of Simulated and experimental backbone scalar couplings  $^3J_{\text{HNH}\alpha}$ ,  $^3J_{\text{HNC}\beta}$ ,  $^3J_{\text{H}\alpha\text{C}}$ ,  $^3J_{\text{HNC}}$ ,  $^3J_{\text{HNC}\alpha}$ ,  $^2J_{\text{NC}\alpha}$ , and  $^1J_{\text{NC}\alpha}$  for ALA<sub>5</sub> and ALA<sub>7</sub>. The left panel stands for ALA<sub>5</sub> and the right panel stands for ALA<sub>7</sub>. Experimental values were taken from Ref<sup>10</sup>.

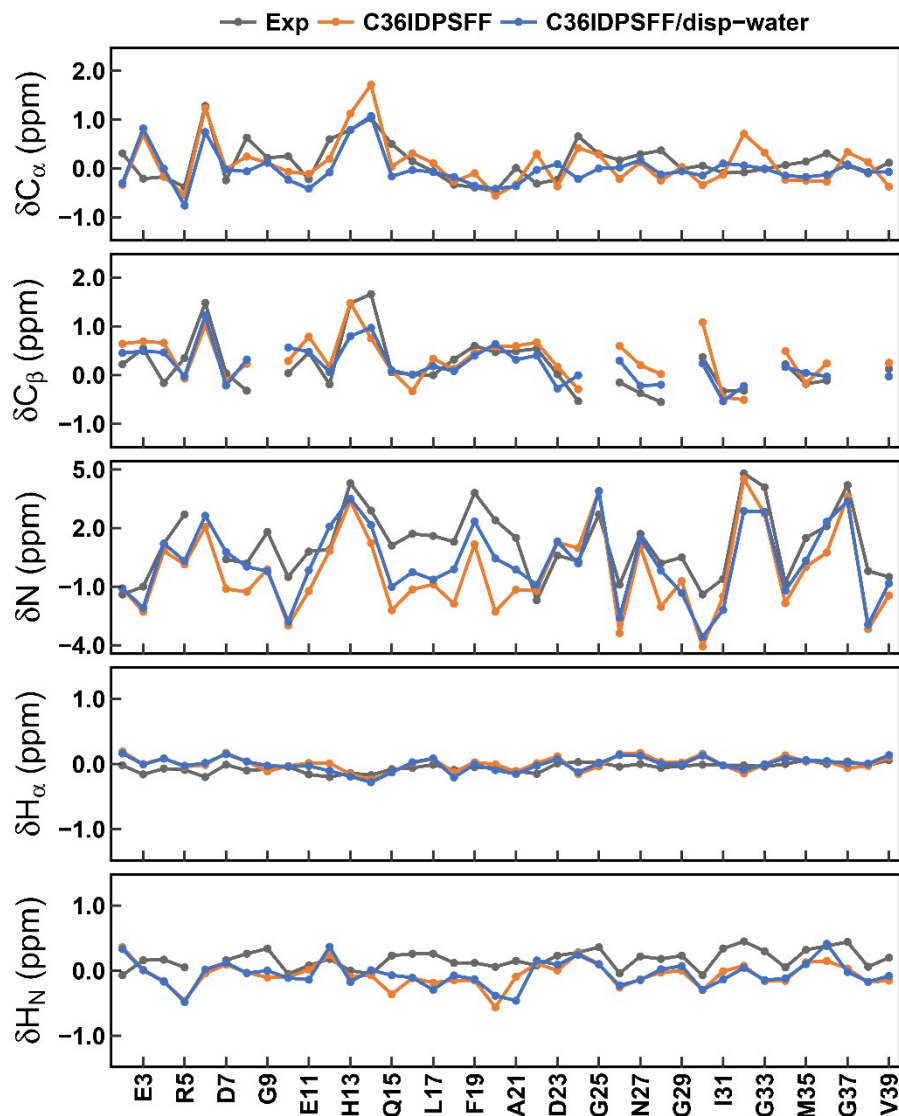

Fig. S6. Comparison of Simulated and experimental chemical shifts of  $C_{\alpha}$ ,  $C_{\beta}$ , N,  $H_{\alpha}$ , and HN atoms for AB40. The initial structures of MD simulations are retrieved from the PDB structure with the last two residues removed. Experimental values were taken from Ref<sup>8</sup>.

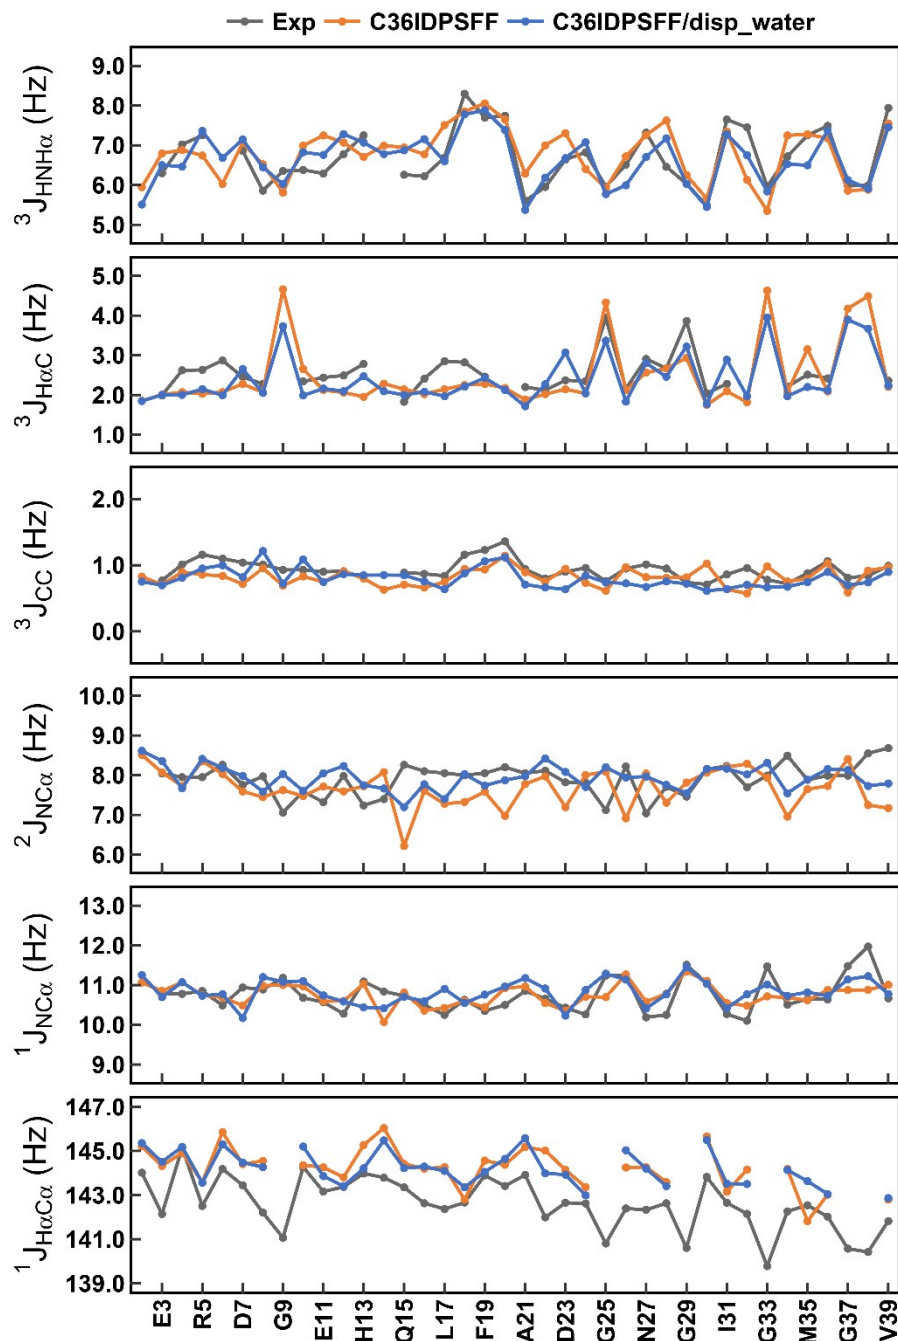

Fig. S7. Comparison of Simulated and experimental backbone scalar couplings  $^3J_{\text{HNH}\alpha}$ ,  $^3J_{\text{H}\alpha\text{C}}$ ,  $^3J_{\text{CC}}$ ,  $^2J_{\text{NC}\alpha}$ ,  $^1J_{\text{NC}\alpha}$ , and  $^1J_{\text{H}\alpha\text{C}\alpha}$  for A $\beta$ 40. The initial structures of MD simulations are retrieved from the PDB structure with the last two residues removed. Experimental values were taken from Ref<sup>9</sup>.

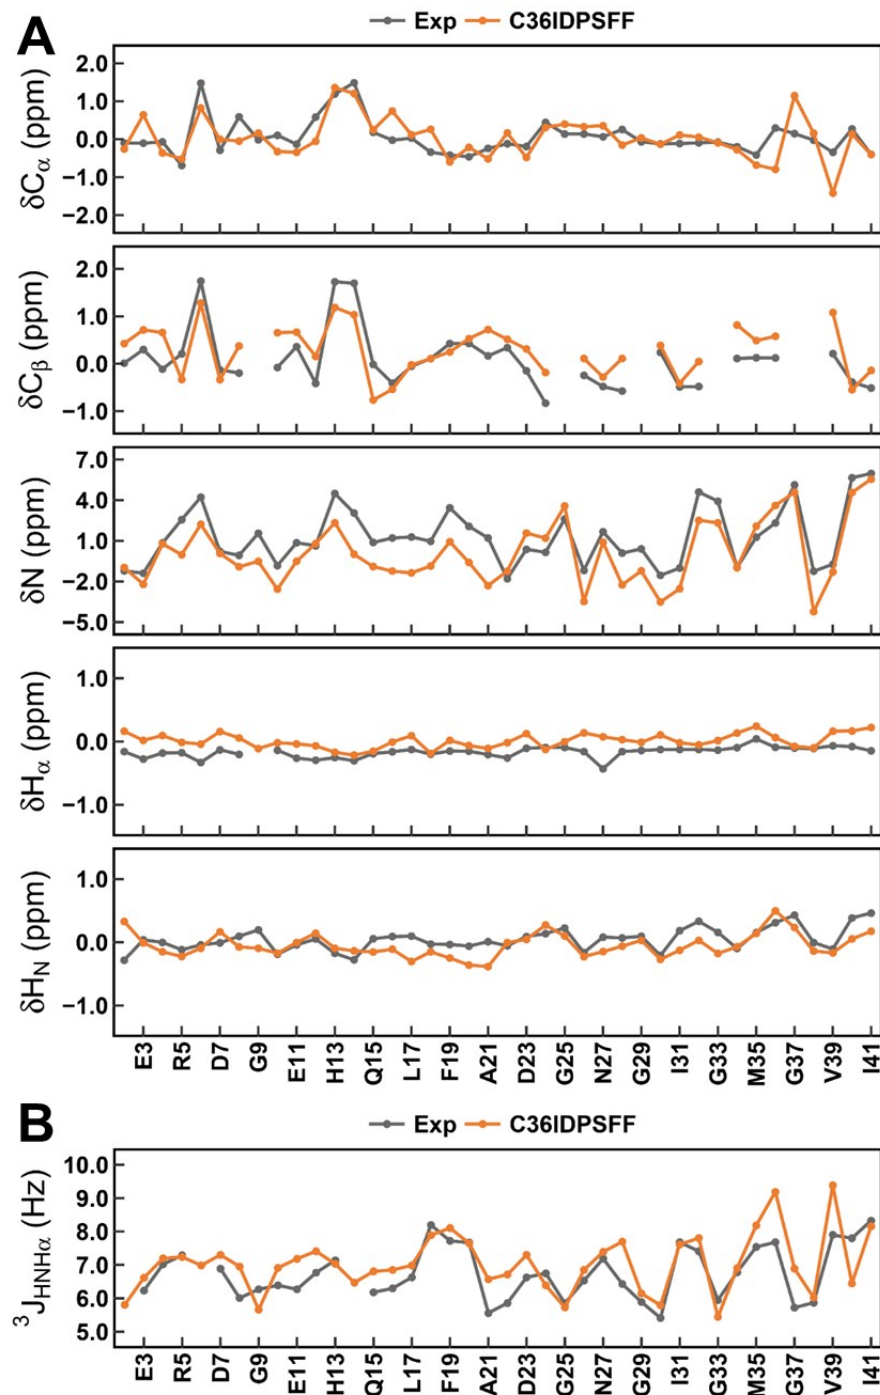

Fig. S8. Comparison of Simulated and experimental NMR observables for A $\beta$ 42. (a) Chemical shifts of C $\alpha$ , C $\beta$ , N, H $\alpha$ , and HN atoms. (b) Backbone scalar couplings  ${}^3J_{HNH_{\alpha}}$ . Experimental chemical shifts values were taken from Ref<sup>11</sup> and experimental scalar couplings values were taken from Ref<sup>9</sup>.

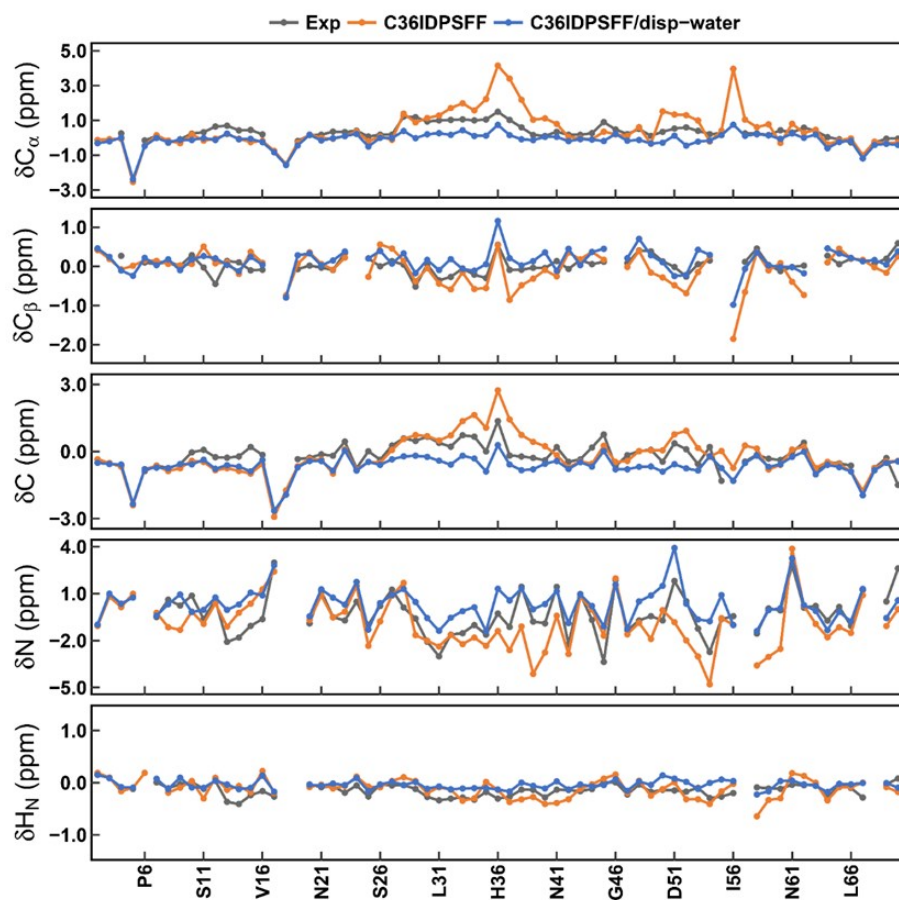

Fig. S9. Comparison of Simulated and experimental chemical shifts of  $C_{\alpha}$ ,  $C_{\beta}$ , C, N, and  $H_N$  atoms for ACTR. Experimental values were taken from Ref<sup>12</sup>.



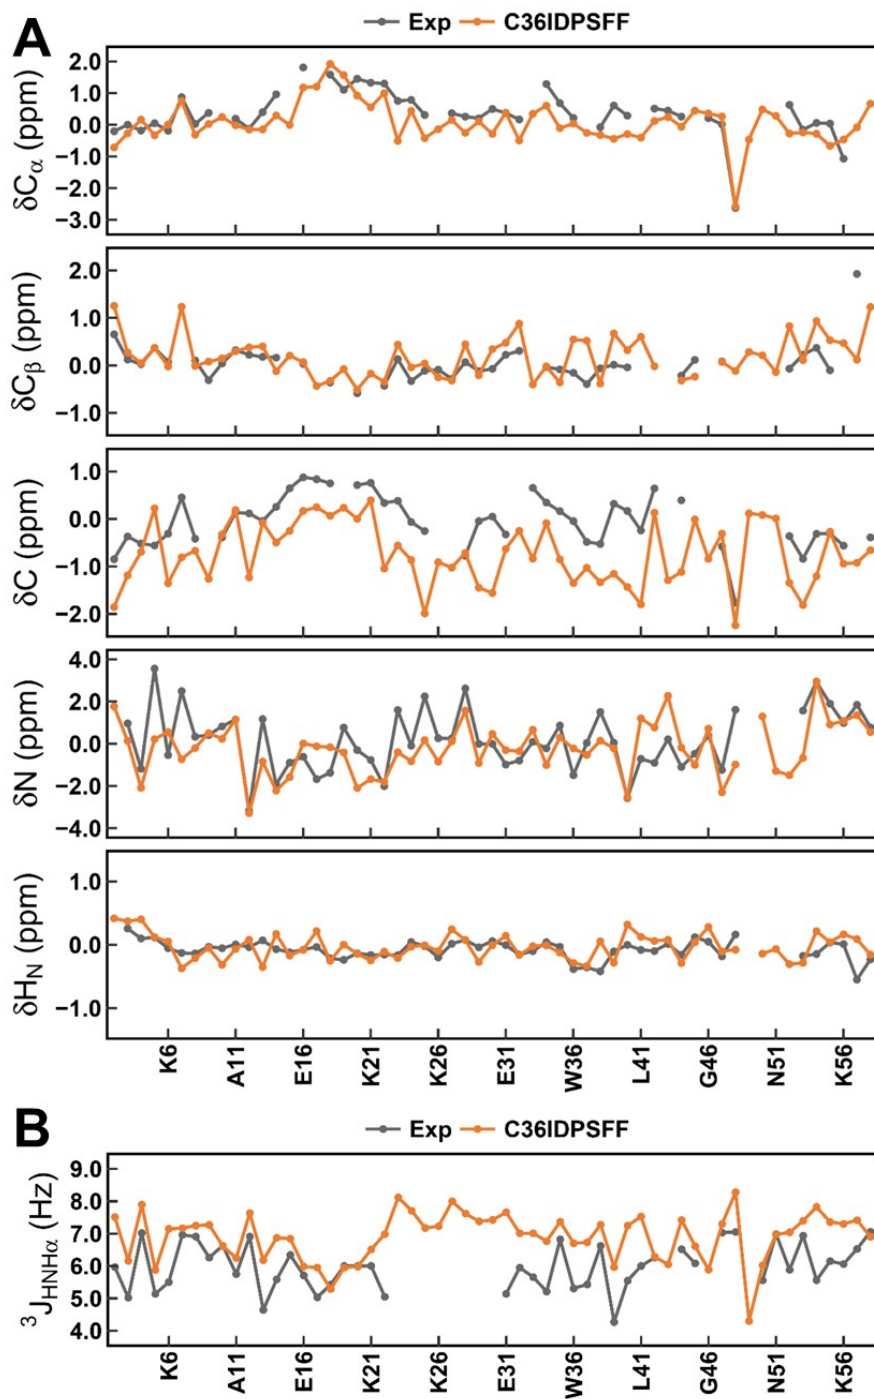

Fig. S10. Comparison of Simulated and experimental NMR observables for drkN SH3. (a) Chemical shifts of  $C_{\alpha}$ ,  $C_{\beta}$ , C, N and  $H_N$  atoms. (b) Backbone scalar couplings  ${}^3J_{HNH_{\alpha}}$ . Experimental chemical shifts values were taken from Ref<sup>13</sup> and experimental scalar couplings values were taken from Ref<sup>14</sup>.

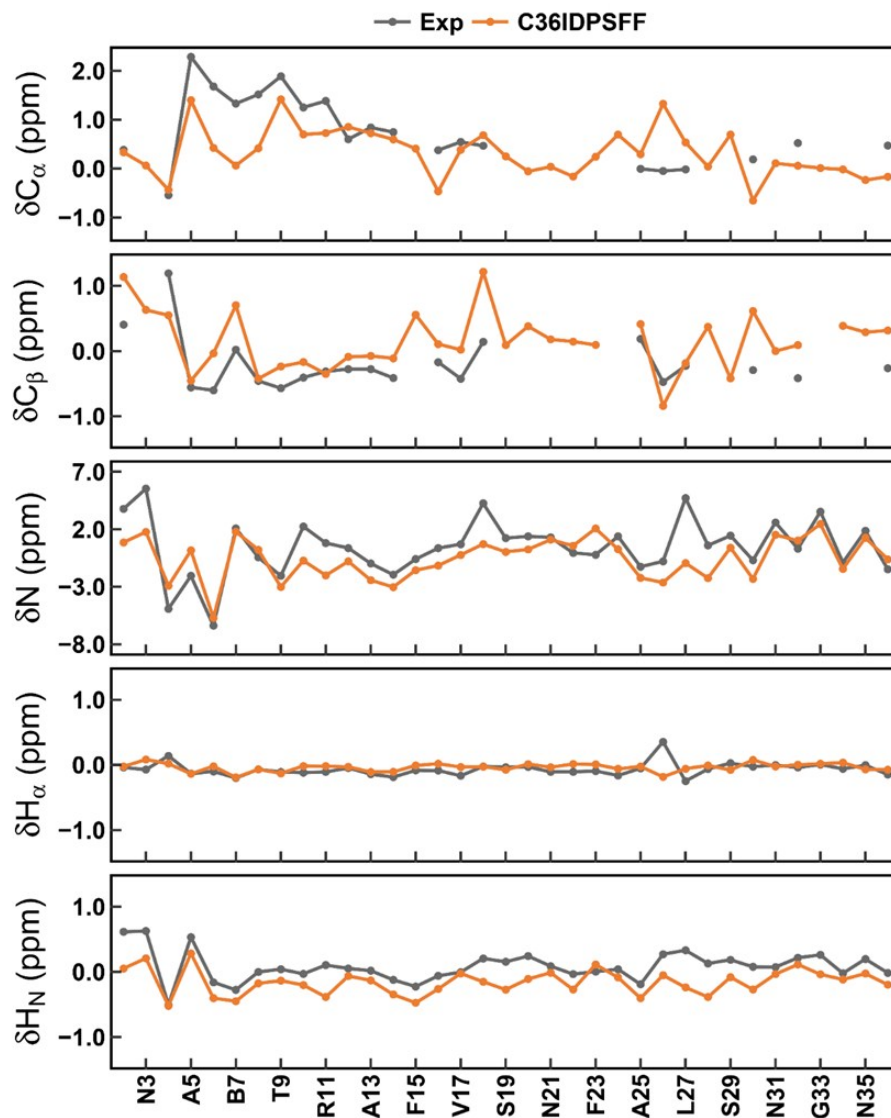

Fig. S11. Comparison of Simulated and experimental chemical shifts of  $C_{\alpha}$ ,  $C_{\beta}$ , N,  $H_{\alpha}$ , and HN atoms for hIAPP. Experimental values were taken from Ref<sup>15</sup>.

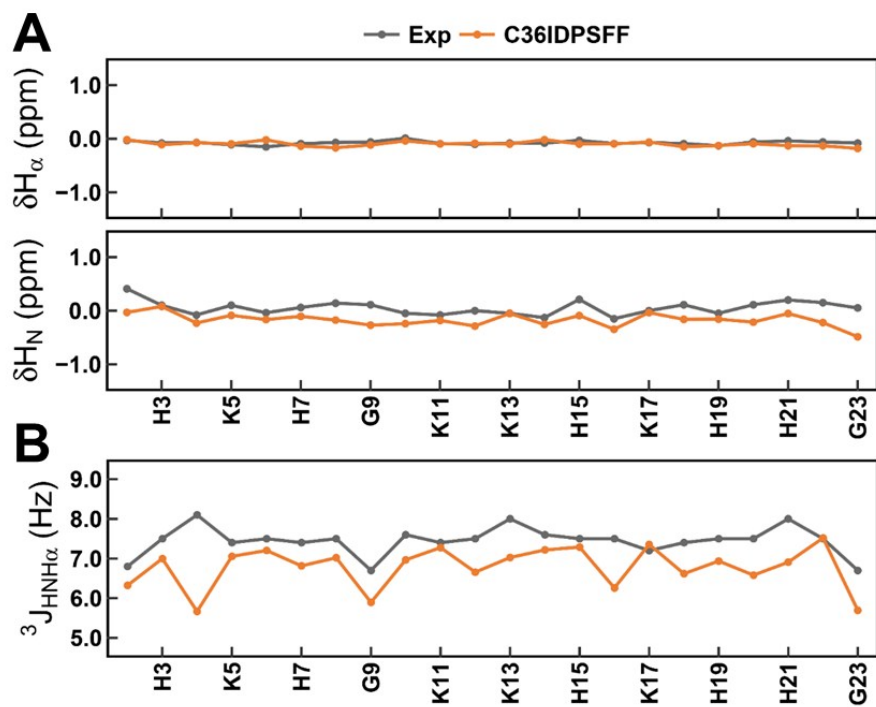

Fig. S12. Comparison of Simulated and experimental NMR observables for Histatin-5. (a) Chemical shifts of  $H_{\alpha}$  and  $H_N$  atoms. (b) Backbone scalar couplings  ${}^3J_{HNH_{\alpha}}$ . Experimental values were taken from Ref<sup>16</sup>.

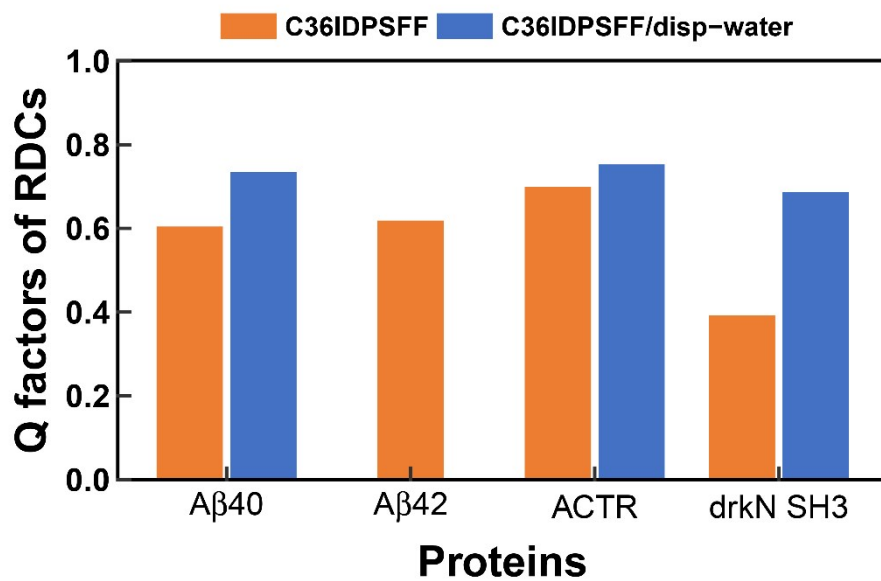

Fig. S13. Q factors of backbone N-H RDCs for disorder proteins Aβ40, Aβ42, ACTR, drkN SH3. The experimental data was taken from Ref<sup>17-19</sup>.

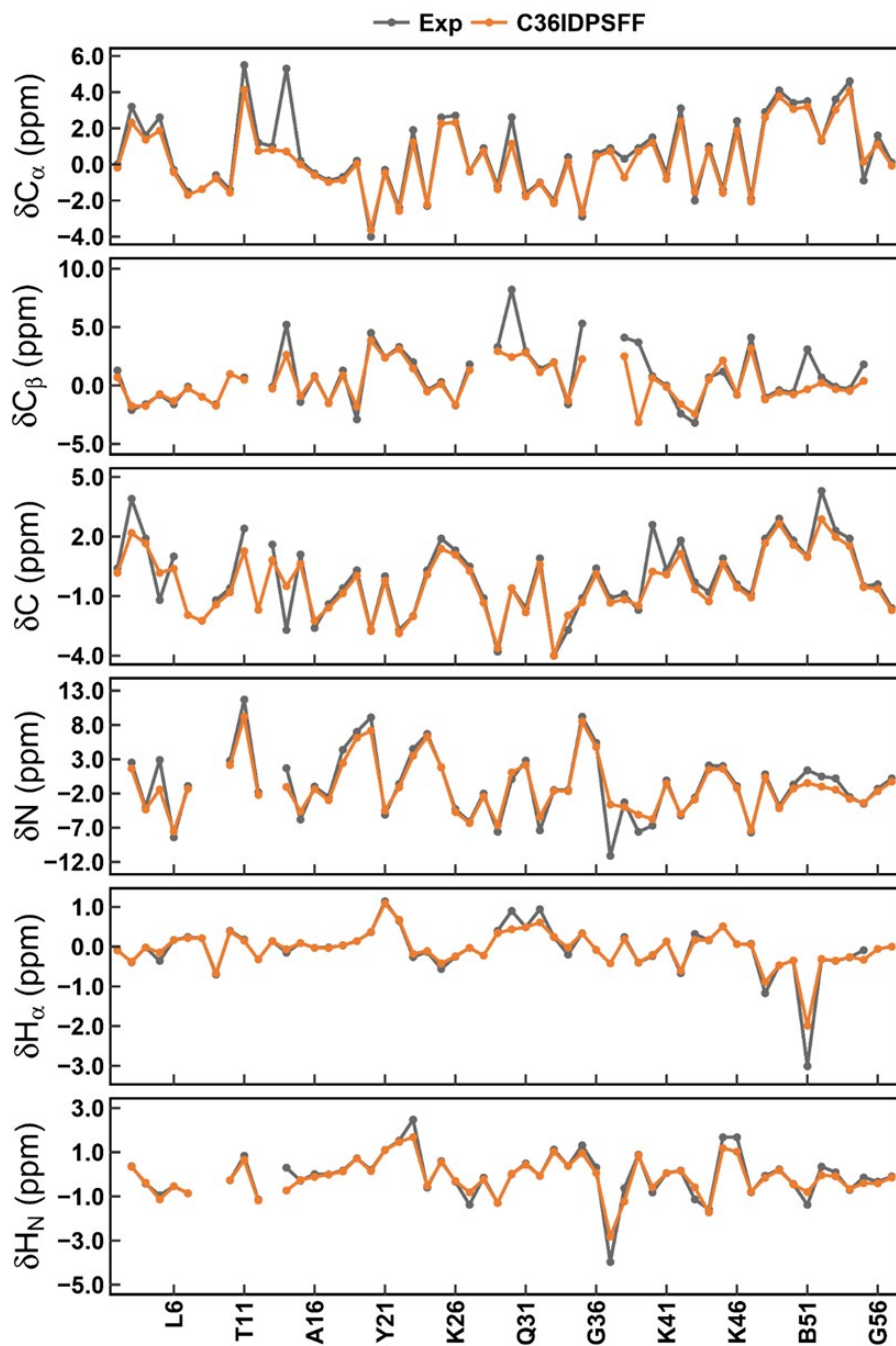

Fig. S14. Comparison of Simulated and experimental chemical shifts of  $C_{\alpha}$ ,  $C_{\beta}$ , C, N,  $H_{\alpha}$  and HN atoms for BPTI. Experimental values were taken from BMRB entry 5359.

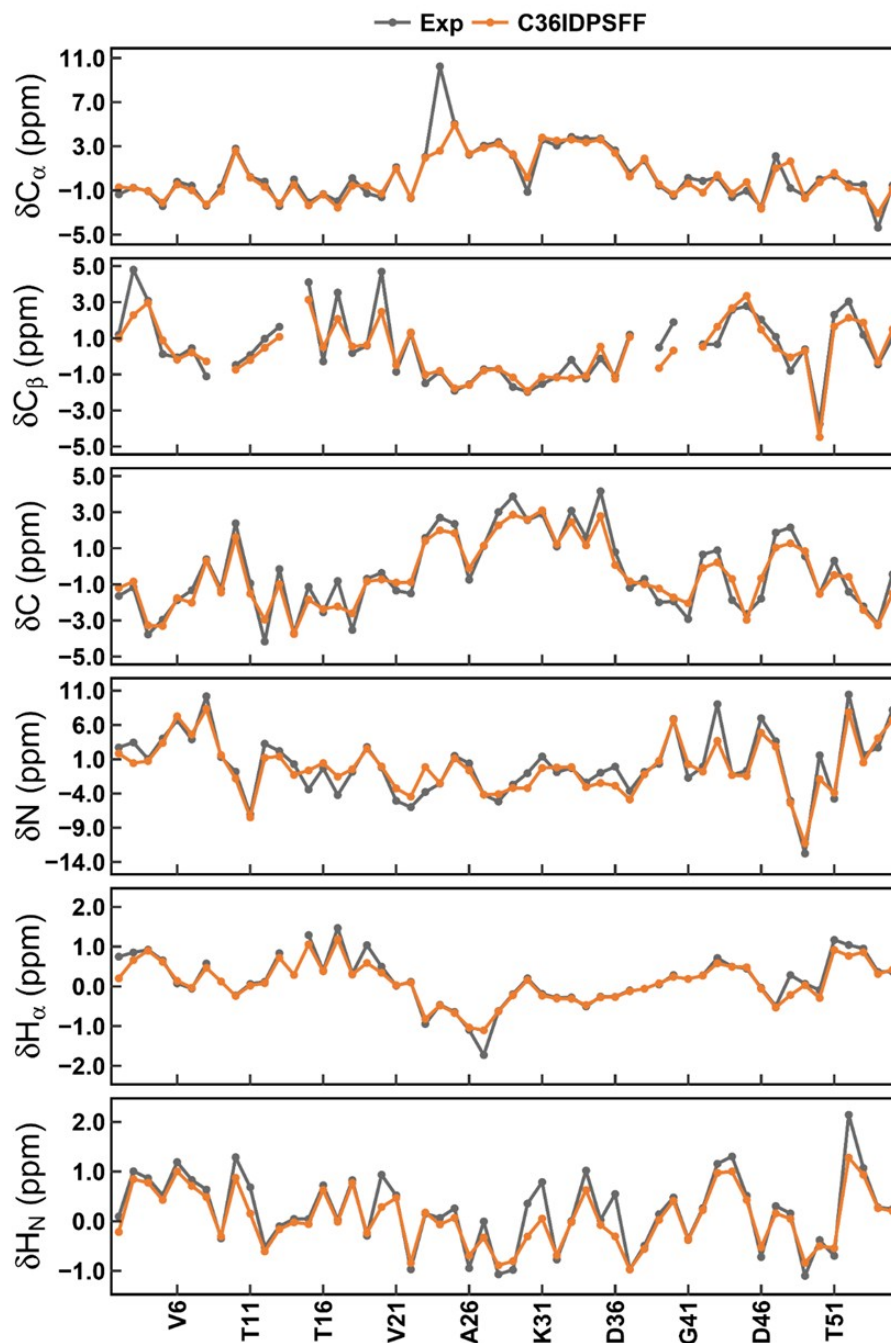

Fig. S15. Comparison of Simulated and experimental chemical shifts of  $C_{\alpha}$ ,  $C_{\beta}$ , C, N,  $H_{\alpha}$  and HN atoms for GB3. Experimental values were taken from Ref<sup>20</sup>.

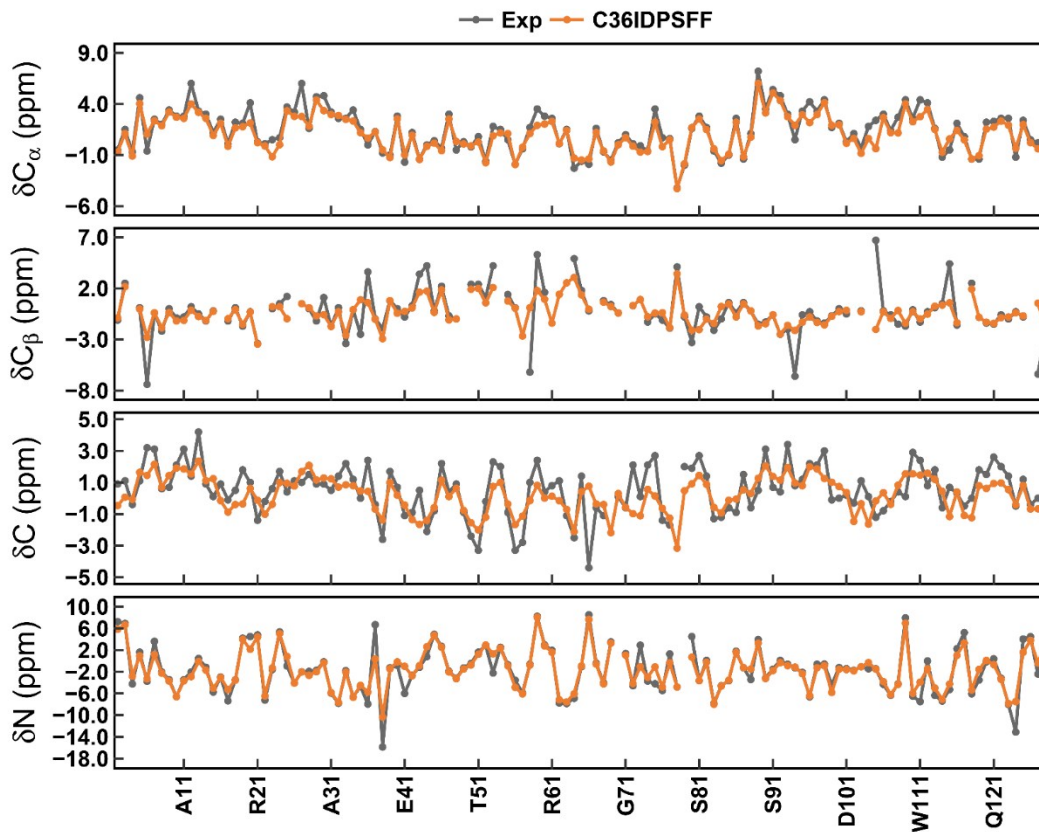

Fig. S16. Comparison of Simulated and experimental chemical shifts of  $C_{\alpha}$ ,  $C_{\beta}$ , C, and N atoms for HEWL. Experimental values were taken from Ref<sup>21</sup>.

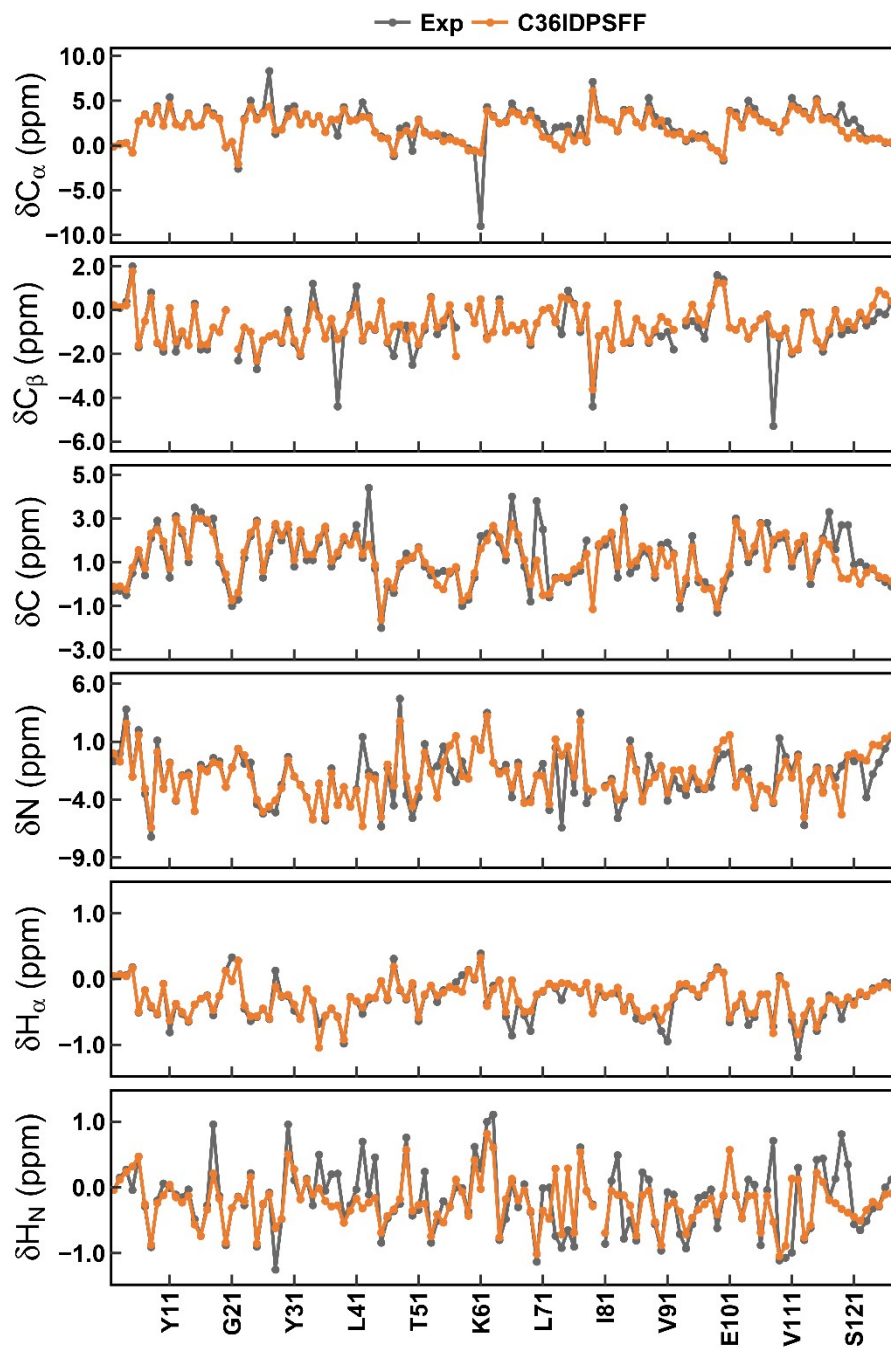

Fig. S17. Comparison of Simulated and experimental chemical shifts of  $C_{\alpha}$ ,  $C_{\beta}$ , C, N,  $H_{\alpha}$ , and HN atoms for 2JPU. Experimental values were taken from BMRB entry 15265.



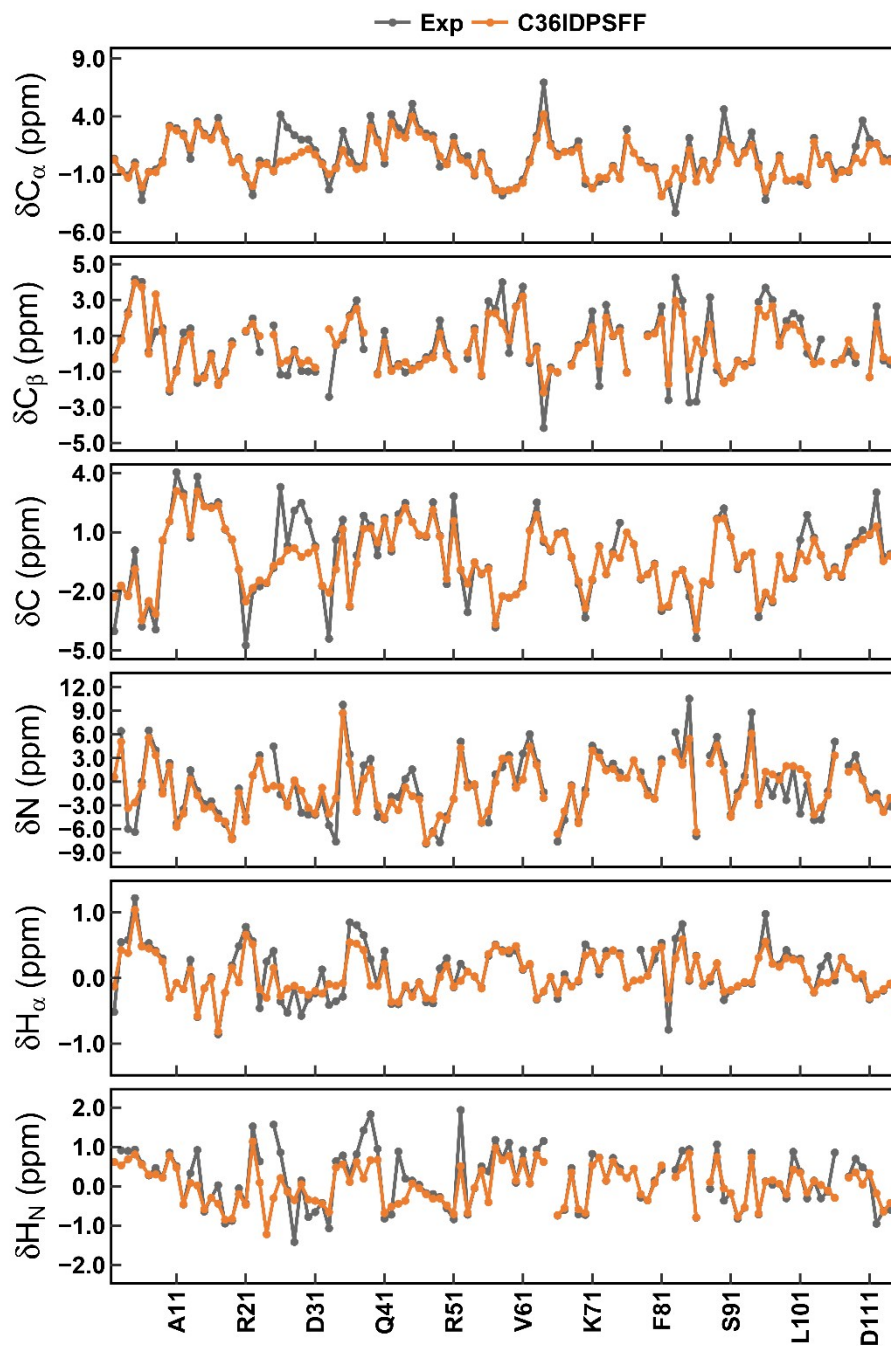

Fig. S18. Comparison of Simulated and experimental chemical shifts of  $C_{\alpha}$ ,  $C_{\beta}$ , C, N,  $H_{\alpha}$ , and HN atoms for 2JQN. Experimental values were taken from BMRB entry 15281.

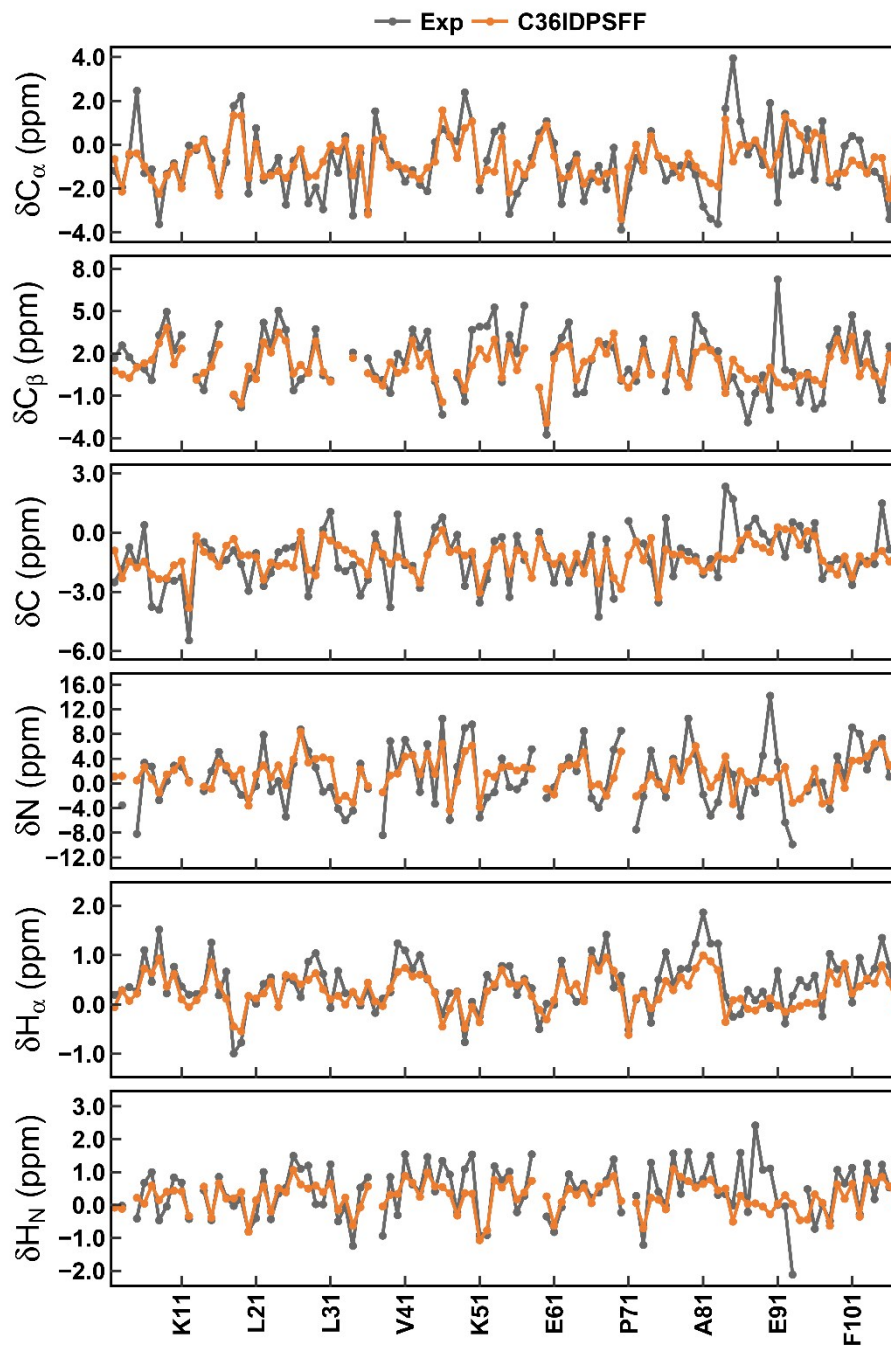

Fig. S19. Comparison of Simulated and experimental chemical shifts of  $C_{\alpha}$ ,  $C_{\beta}$ , C, N,  $H_{\alpha}$ , and HN atoms for 2KL6. Experimental values were taken from BMRB entry 16385.

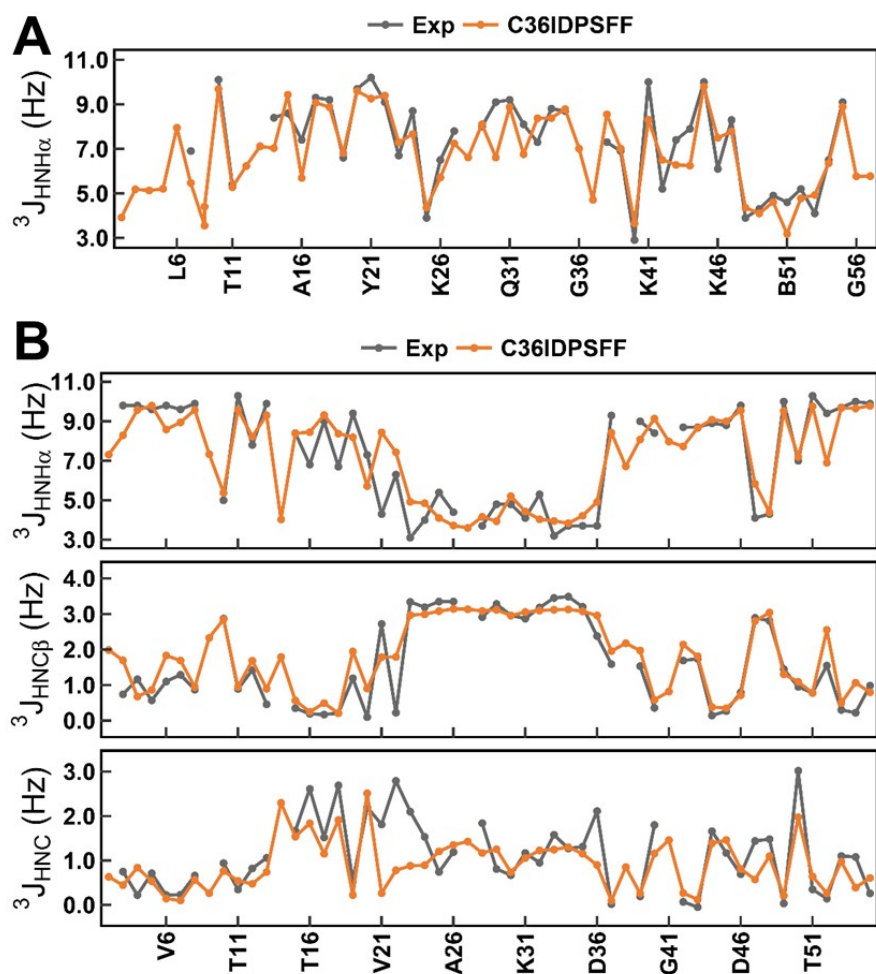

Fig. S20. Comparison of Simulated and experimental Backbone scalar couplings for folded proteins. (a)  $^3J_{\text{HNH}\alpha}$  scalar couplings for BPTI. (b)  $^3J_{\text{HNH}\alpha}$ ,  $^3J_{\text{HNC}\beta}$ , and  $^3J_{\text{HNC}}$  scalar couplings for GB3. Experimental values were taken from Ref<sup>1, 22</sup>.

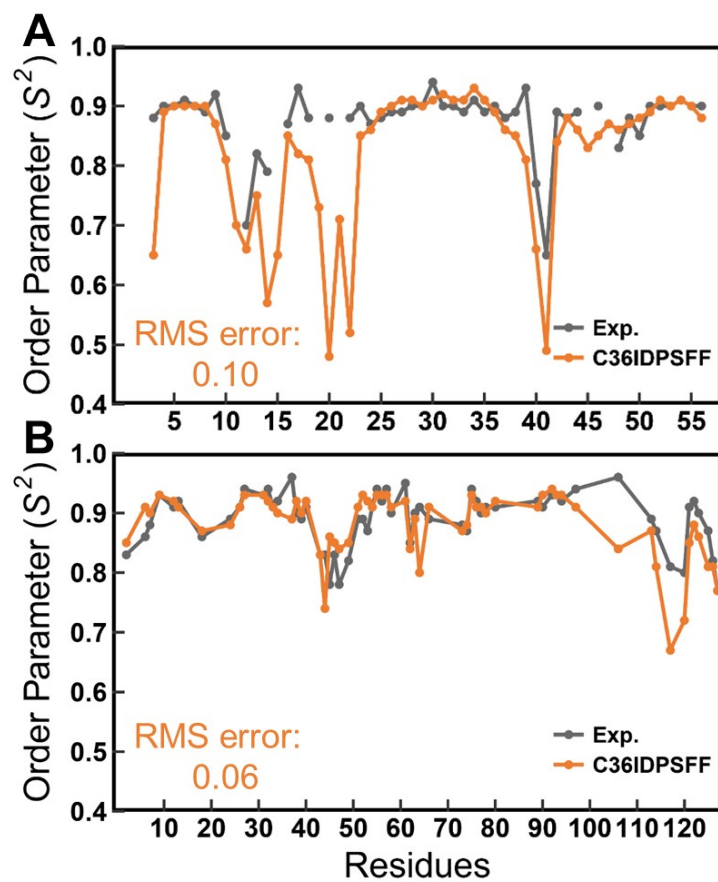

Fig. S21. Order parameter  $S^2$  of backbone amide N-H group for folded proteins. (a) GB3. (b) HEWL. Experimental values were taken from Ref<sup>23, 24</sup>.

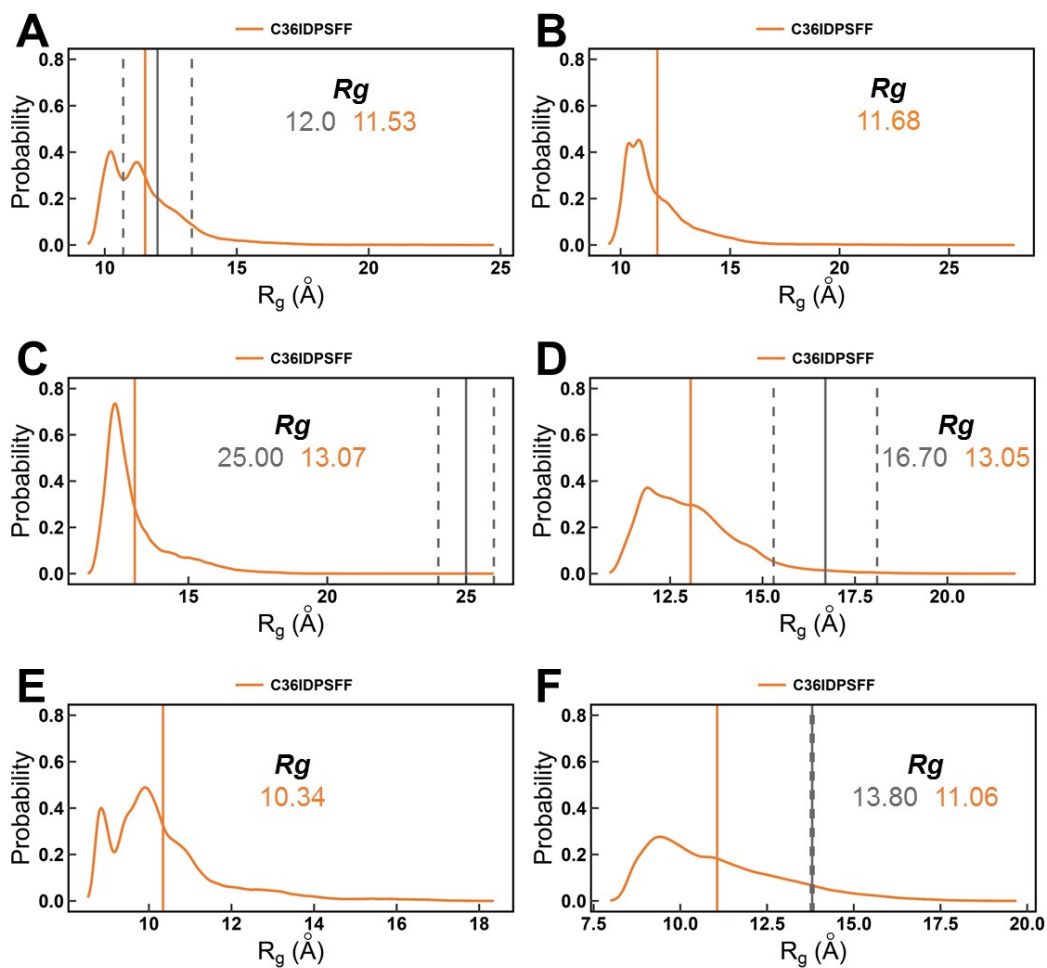

Fig. S22. Probability distributions of the simulated radii of gyration for disorder proteins. (a) A $\beta$ 40. (b) A $\beta$ 42. (c) ACTR. (d) drkN SH3. (e) hIAPP. (f) Histatin-5. The averaged  $R_g$  values of simulations with C36IDPSFF are marked with the vertical solid lines in orange. The experimental values<sup>25-28</sup> are marked with vertical solid lines in gray and the error are marked with two vertical dash lines in gray. The simulated and experimental  $R_g$  values are also labeled with the corresponding colors.

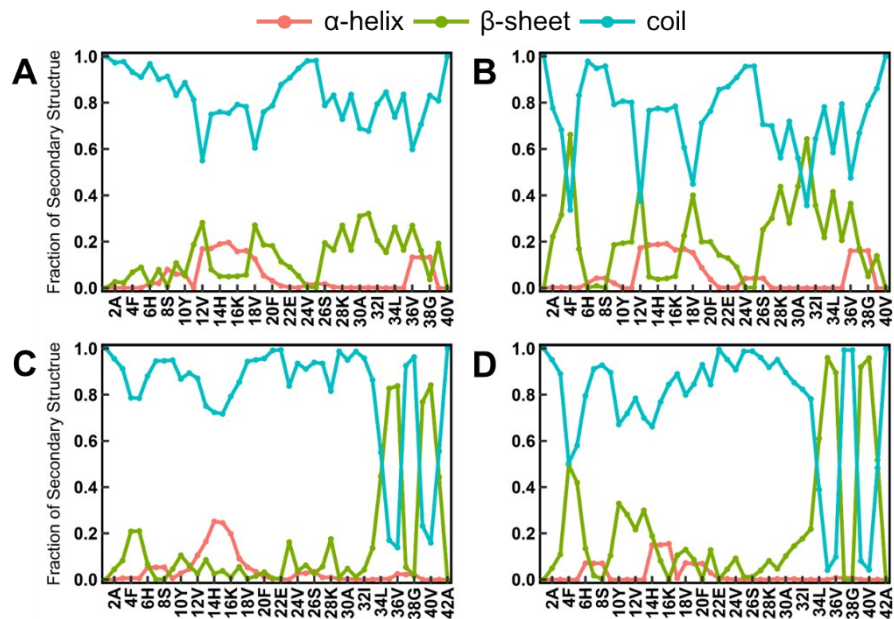

Fig. S23. The fraction of secondary structures of Aβ40 and Aβ42 in different simulation periods. (A) 200-800ns simulation of Aβ40. (B) 800-1000 ns simulation of Aβ40. (C) 200-800ns simulation of Aβ42. (D) 800-1000 ns simulation of Aβ42. The fractions of secondary structure were calculated by DSSP software. In this calculation, DSSP code “H”, “G” and “I” are considered as “helix”; “B” and “E” are considered as “sheet”; “T”, “S” and blanks are considered as “coil”

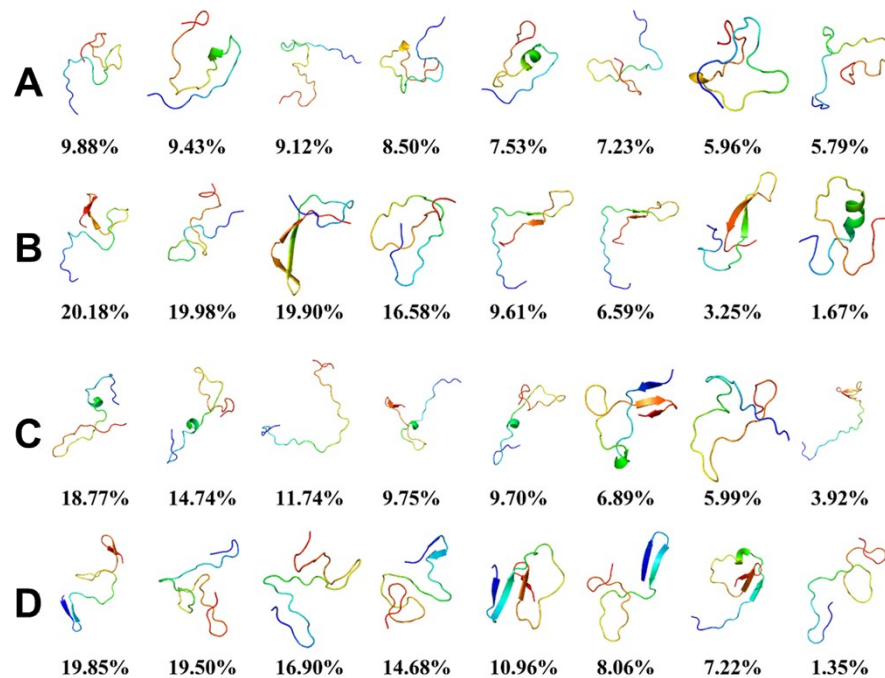

Fig. S24. Conformation clusters in the simulations of A $\beta$ 40 and A $\beta$ 42 in different simulation time. (A) Top 8 conformation clusters of A $\beta$ 40 in 200-800 ns. (B) Top 8 conformation clusters of A $\beta$ 40 in 800-1000 ns. (C) Top 8 conformation clusters of A $\beta$ 42 in 200-800 ns. (D) Top 8 conformation clusters of A $\beta$ 42 in 800-1000 ns. The percentages are labeled under the representative conformations of top clusters.

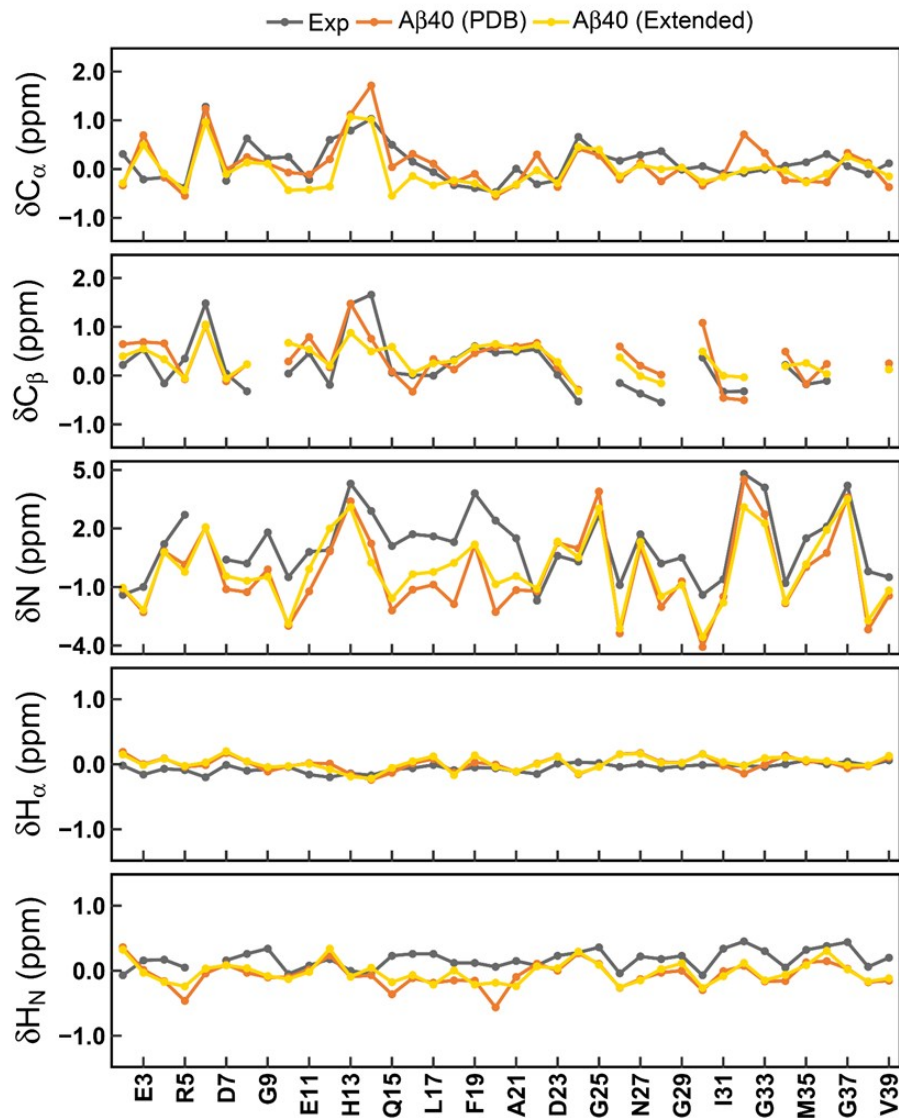

Fig. S25. Comparison of Simulated and experimental chemical shifts of  $C_{\alpha}$ ,  $C_{\beta}$ , N,  $H_{\alpha}$  and HN atoms for A $\beta$ 40 from two different initial structures. Experimental values are same with Figure S3



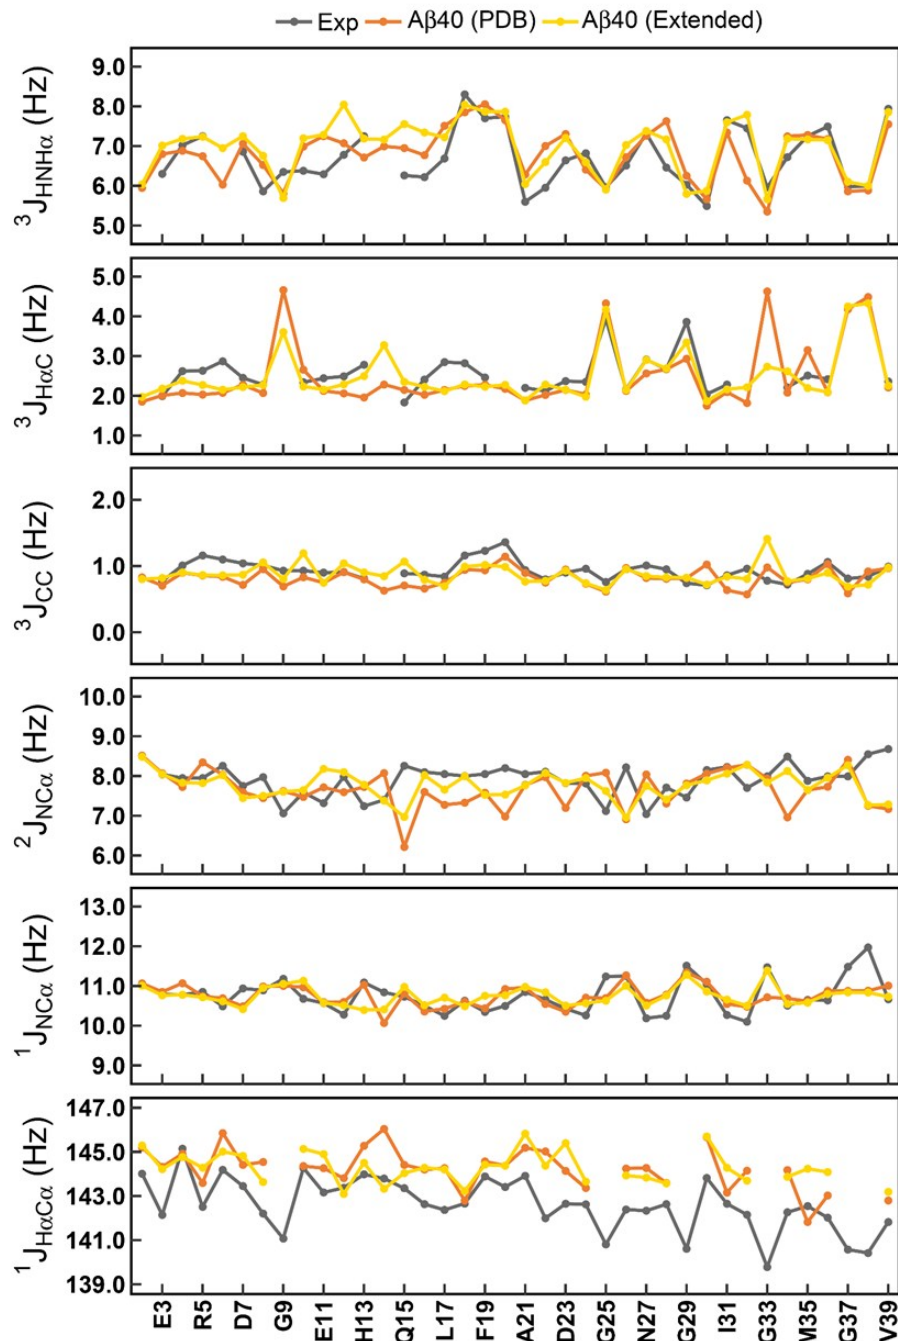

Fig. S26. Comparison of Simulated and experimental backbone scalar couplings  $^3J_{\text{HNH}\alpha}$ ,  $^3J_{\text{H}\alpha\text{C}}$ ,  $^3J_{\text{CC}}$ ,  $^2J_{\text{NC}\alpha}$ ,  $^1J_{\text{NC}\alpha}$  and  $^1J_{\text{H}\alpha\text{C}\alpha}$  for Aβ40 from two different initial structures. Experimental values are same with Figure S4

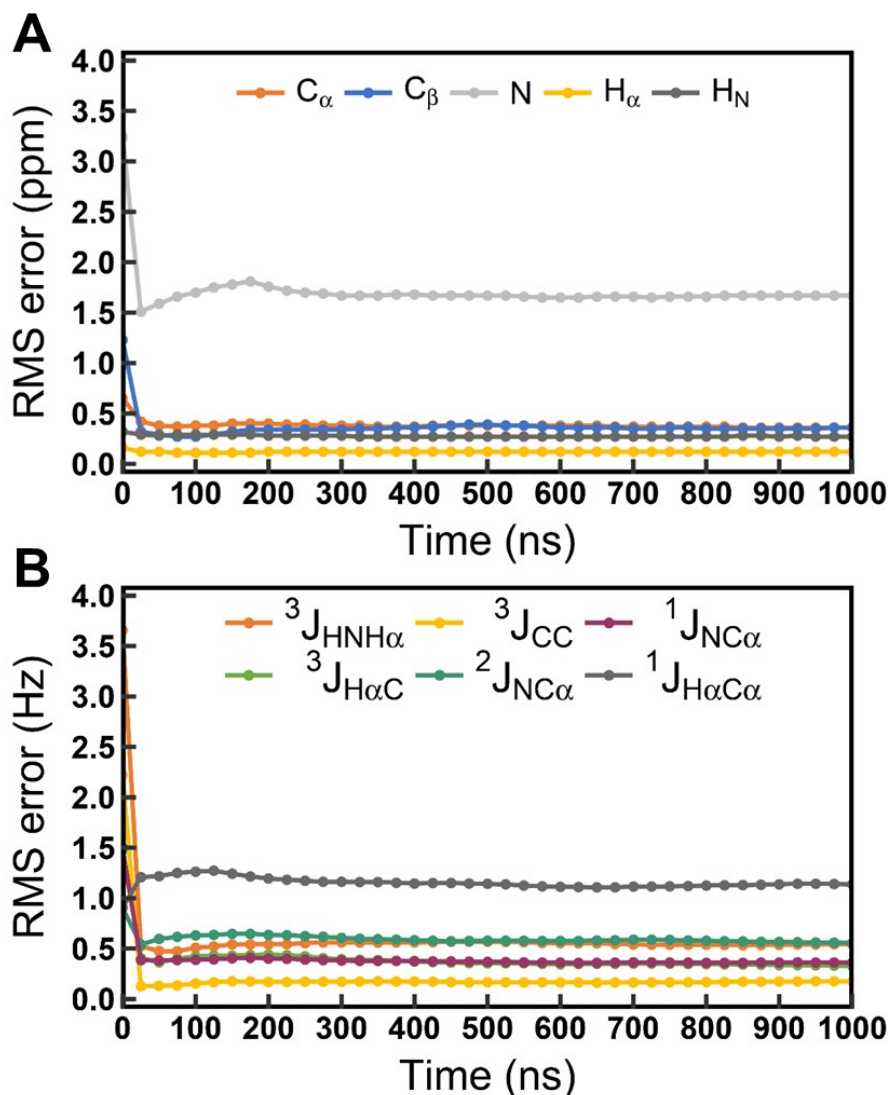

Fig. S27. Time-dependent RMS errors between experimental data and cumulative-averaged simulated chemical shifts for A $\beta$ 40 initial from an extended structure.

## References

- (1) Vogeli, B.; Ying, J. F.; Grishaev, A.; Bax, A., Limits on variations in protein backbone dynamics from precise measurements of scalar couplings. *J. Am. Chem. Soc.* **2007**, 129, 9377-9385.
- (2) And, J. S. H.; Bax, A., Determination of  $\phi$  and  $\chi_1$  Angles in Proteins from  $^{13}C$ - $^{13}C$  Three-Bond J Couplings Measured by Three-Dimensional Heteronuclear NMR. How Planar Is the Peptide Bond? *J. Am. Chem. Soc.* **1997**, 119.
- (3) Hennig, M.; Bermel, W.; Schwalbe, H.; Griesinger, C., Determination of psi torsion angle restraints from  $(^3J_{C\alpha-C\alpha})$  and  $(^3J_{C\alpha-H-N})$  coupling constants in proteins. *J. Am. Chem. Soc.* **2000**, 122, 6268-6277.
- (4) Lee, J. H.; Li, F.; Grishaev, A.; Bax, A., Quantitative residue-specific protein backbone torsion angle dynamics from concerted measurement of  $^3J$  couplings. *J. Am. Chem. Soc.* **2015**, 137, 1432-1435.

- (5) Ding, K. Y.; Gronenborn, A. M., Protein backbone H-1(N)-C-13(alpha) and N-15-C-13(alpha) residual dipolar and J couplings: New constraints for NMR structure determination. *J. Am. Chem. Soc.* **2004**, 126, 6232-6233.
- (6) Wirmer, J.; Schwalbe, H., Angular dependence of (1)J(N-i,C-alpha i) and (2)J(N-i,C alpha(i-1)) coupling constants measured in J-modulated HSQCs. *J. Biomol. NMR* **2002**, 23, 47-55.
- (7) Mantsyzov, A. B.; Shen, Y.; Lee, J. H.; Hummer, G.; Bax, A., MERA: a webserver for evaluating backbone torsion angle distributions in dynamic and disordered proteins from NMR data. *J. Biomol. NMR* **2015**, 63, 85-95.
- (8) Hou, L.; Shao, H.; Zhang, Y.; Li, H.; Menon, N. K.; Neuhaus, E. B.; Brewer, J. M.; Byeon, I. J.; Ray, D. G.; Vitek, M. P., Solution NMR studies of the A beta(1-40) and A beta(1-42) peptides establish that the Met35 oxidation state affects the mechanism of amyloid formation. *J. Am. Chem. Soc.* **2004**, 126, 1992-2005.
- (9) Roche, J.; Shen, Y.; Lee, J. H.; Ying, J. F.; Bax, A., Monomeric A beta(1-40) and A beta(1-42) Peptides in Solution Adopt Very Similar Ramachandran Map Distributions That Closely Resemble Random Coil. *Biochemistry* **2016**, 55, 762-775.
- (10) Graf, J.; Nguyen, P. H.; Stock, G.; Schwalbe, H., Structure and dynamics of the homologous series of alanine peptides: A joint molecular dynamics/NMR study. *J. Am. Chem. Soc.* **2007**, 129, 1179-1189.
- (11) Walti, M. A.; Orts, J.; Vogeli, B.; Campioni, S.; Riek, R., Solution NMR studies of recombinant A beta(1-42): from the presence of a micellar entity to residual beta-sheet structure in the soluble species. *ChemBioChem* **2015**, 16, 659-669.
- (12) Ebert, M. O.; Bae, S. H.; Dyson, H. J.; Wright, P. E., NMR relaxation study of the complex formed between CBP and the activation domain of the nuclear hormone receptor coactivator ACTR. *Biochemistry* **2008**, 47, 1299-1308.
- (13) Lee, J. H.; Zhang, D.; Hughes, C.; Okuno, Y.; Sekhar, A.; Cavagnero, S., Heterogeneous binding of the SH3 client protein to the DnaK molecular chaperone. *Proc. Natl. Acad. Sci. U. S. A.* **2015**, 112, E4206-4215.
- (14) Zhang, O.; Forman-Kay, J. D., Structural characterization of folded and unfolded states of an SH3 domain in equilibrium in aqueous buffer. *Biochemistry* **1995**, 34, 6784-6794.
- (15) Rodriguez Camargo, D. C.; Tripsianes, K.; Buday, K.; Franko, A.; Gobl, C.; Hartmuller, C.; Sarkar, R.; Aichler, M.; Mettenleiter, G.; Schulz, M.; Boddich, A.; Erck, C.; Martens, H.; Walch, A. K.; Madl, T.; Wanker, E. E.; Conrad, M.; de Angelis, M. H.; Reif, B., The redox environment triggers conformational changes and aggregation of hIAPP in Type II Diabetes. *Sci. Rep.* **2017**, 7, 44041.
- (16) Raj, P. A.; Marcus, E.; Sukumaran, D. K., Structure of human salivary histatin 5 in aqueous and nonaqueous solutions. *Biopolymers* **1998**, 45, 51-67.
- (17) Yan, Y.; McCallum, S. A.; Wang, C., M35 oxidation induces A beta40-like structural and dynamical changes in A beta42. *J. Am. Chem. Soc.* **2008**, 130, 5394-5395.
- (18) Iesmantavicius, V.; Jensen, M. R.; Ozenne, V.; Blackledge, M.; Poulsen, F. M.; Kjaergaard, M., Modulation of the Intrinsic Helix Propensity of an Intrinsically Disordered Protein Reveals Long-Range Helix-Helix Interactions. *J. Am. Chem. Soc.* **2013**, 135, 10155-10163.
- (19) Marsh, J. A.; Baker, J. M. R.; Tollinger, M.; Forman-Kay, J. D., Calculation of residual dipolar couplings from disordered state ensembles using local alignment. *J. Am. Chem. Soc.* **2008**, 130, 7804-+.
- (20) Li, F.; Grishaev, A.; Ying, J.; Bax, A., Side Chain Conformational Distributions of a Small Protein Derived from Model-Free Analysis of a Large Set of Residual Dipolar Couplings. *J. Am. Chem. Soc.* **2015**, 137, 14798-14811.
- (21) Schwalbe, H.; Grimshaw, S. B.; Spencer, A.; Buck, M.; Boyd, J.; Dobson, C. M.; Redfield, C.; Smith, L. J., A refined solution structure of hen lysozyme determined using residual dipolar coupling data. *Protein Sci.* **2001**, 10, 677-688.
- (22) Balasubramanian, S.; Nirmala, R.; Beveridge, D. L.; Bolton, P. H., Comparison of the <sup>13</sup>C relaxation times and proton scalar couplings of BPTI with values predicted by molecular dynamics. *J. Magn. Reson. B* **1994**, 104, 240-249.
- (23) Yao, L. S.; Grishaev, A.; Cornilescu, G.; Bax, A., Site-Specific Backbone Amide N-15 Chemical Shift Anisotropy Tensors in a Small Protein from Liquid Crystal and Cross-Correlated Relaxation Measurements. *J. Am. Chem. Soc.* **2010**, 132, 4295-4309.
- (24) Buck, M.; Boyd, J.; Redfield, C.; MacKenzie, D. A.; Jeenes, D. J.; Archer, D. B.; Dobson, C. M., Structural Determinants of Protein Dynamics: Analysis of <sup>15</sup>N NMR Relaxation Measurements for Main-Chain and Side-

Chain Nuclei of Hen Egg White Lysozyme. *Biochemistry* **1995**, 34, 4041-4055.

(25) Granata, D.; Baftizadeh, F.; Habchi, J.; Galvagnion, C.; De Simone, A.; Camilloni, C.; Laio, A.; Vendruscolo, M., The inverted free energy landscape of an intrinsically disordered peptide by simulations and experiments. *Sci. Rep.* **2015**, 5, 15449.

(26) Gely, S.; Lowry, D. F.; Bernard, C.; Jensen, M. R.; Blackledge, M.; Costanzo, S.; Bourhis, J. M.; Darbon, H.; Daughdrill, G.; Longhi, S., Solution structure of the C-terminal X domain of the measles virus phosphoprotein and interaction with the intrinsically disordered C-terminal domain of the nucleoprotein. *J. Mol. Recognit.* **2010**, 23, 435-447.

(27) Choy, W. Y.; Mulder, F. A. A.; Crowhurst, K. A.; Muhandiram, D. R.; Millett, I. S.; Doniach, S.; Forman-Kay, J. D.; Kay, L. E., Distribution of molecular size within an unfolded state ensemble using small-angle X-ray scattering and pulse field gradient NMR techniques. *J. Mol. Biol.* **2002**, 316, 101-112.

(28) Cragnell, C.; Durand, D.; Cabane, B.; Skepo, M., Coarse-grained modeling of the intrinsically disordered protein Histatin 5 in solution: Monte Carlo simulations in combination with SAXS. *Proteins-Structure Function and Bioinformatics* **2016**, 84, 777-791.
